# Supplementary material for: The phosphate ester group in secondary metabolites
Source: Royal Society of Chemistry journal article supplement (doi:10.1039/d1np00078k), 2022-01-01
Supplement: d1np00078k1.pdf [file d1np00078k1.pdf]

## The Phosphate Ester Group in Secondary Metabolites

### Supporting Information

Franco Della-Felice,\* <sup>[a,b]</sup> Aloisio de Andrade Bartolomeu,<sup>[a]</sup> Ronaldo Aloise Pilli\* <sup>[a]</sup>

[a] Institute of Chemistry, University of Campinas (UNICAMP), P.O. Box 6154, CEP 13083-970 Campinas, São Paulo, Brazil.

[b] Institute of Chemical Research of Catalonia (ICIQ), Barcelona Institute of Science and Technology. Av. Països Catalans 16, 43007 Tarragona, Spain.

\* E-mail: fdellafelice@iciq.es; rapilli@unicamp.br.

## Table of Contents

|                                                                                   |       |
|-----------------------------------------------------------------------------------|-------|
| Figure S1. Polyketides .....                                                      | SI-3  |
| Figure S2. Alkaloids and Related Secondary Metabolites .....                      | SI-6  |
| Figure S3. Peptides.....                                                          | SI-7  |
| Figure S4. Carbohydrate-based Secondary Metabolites .....                         | SI-8  |
| Figure S5: Enolphosphates.....                                                    | SI-10 |
| Figure S6. Lipid-based Secondary Metabolites .....                                | SI-12 |
| Figure S7. Steroids .....                                                         | SI-13 |
| Table S1. Natural sources of phosphorylated secondary metabolites (extended)..... | SI-14 |
| Table S2. Calyculin A ( <b>23</b> ): Biological Studies .....                     | SI-20 |
| Table S3. Adenophostin A ( <b>90</b> ): Biological Studies.....                   | SI-22 |
| References.....                                                                   | SI-23 |

## Figure S1. Polyketides

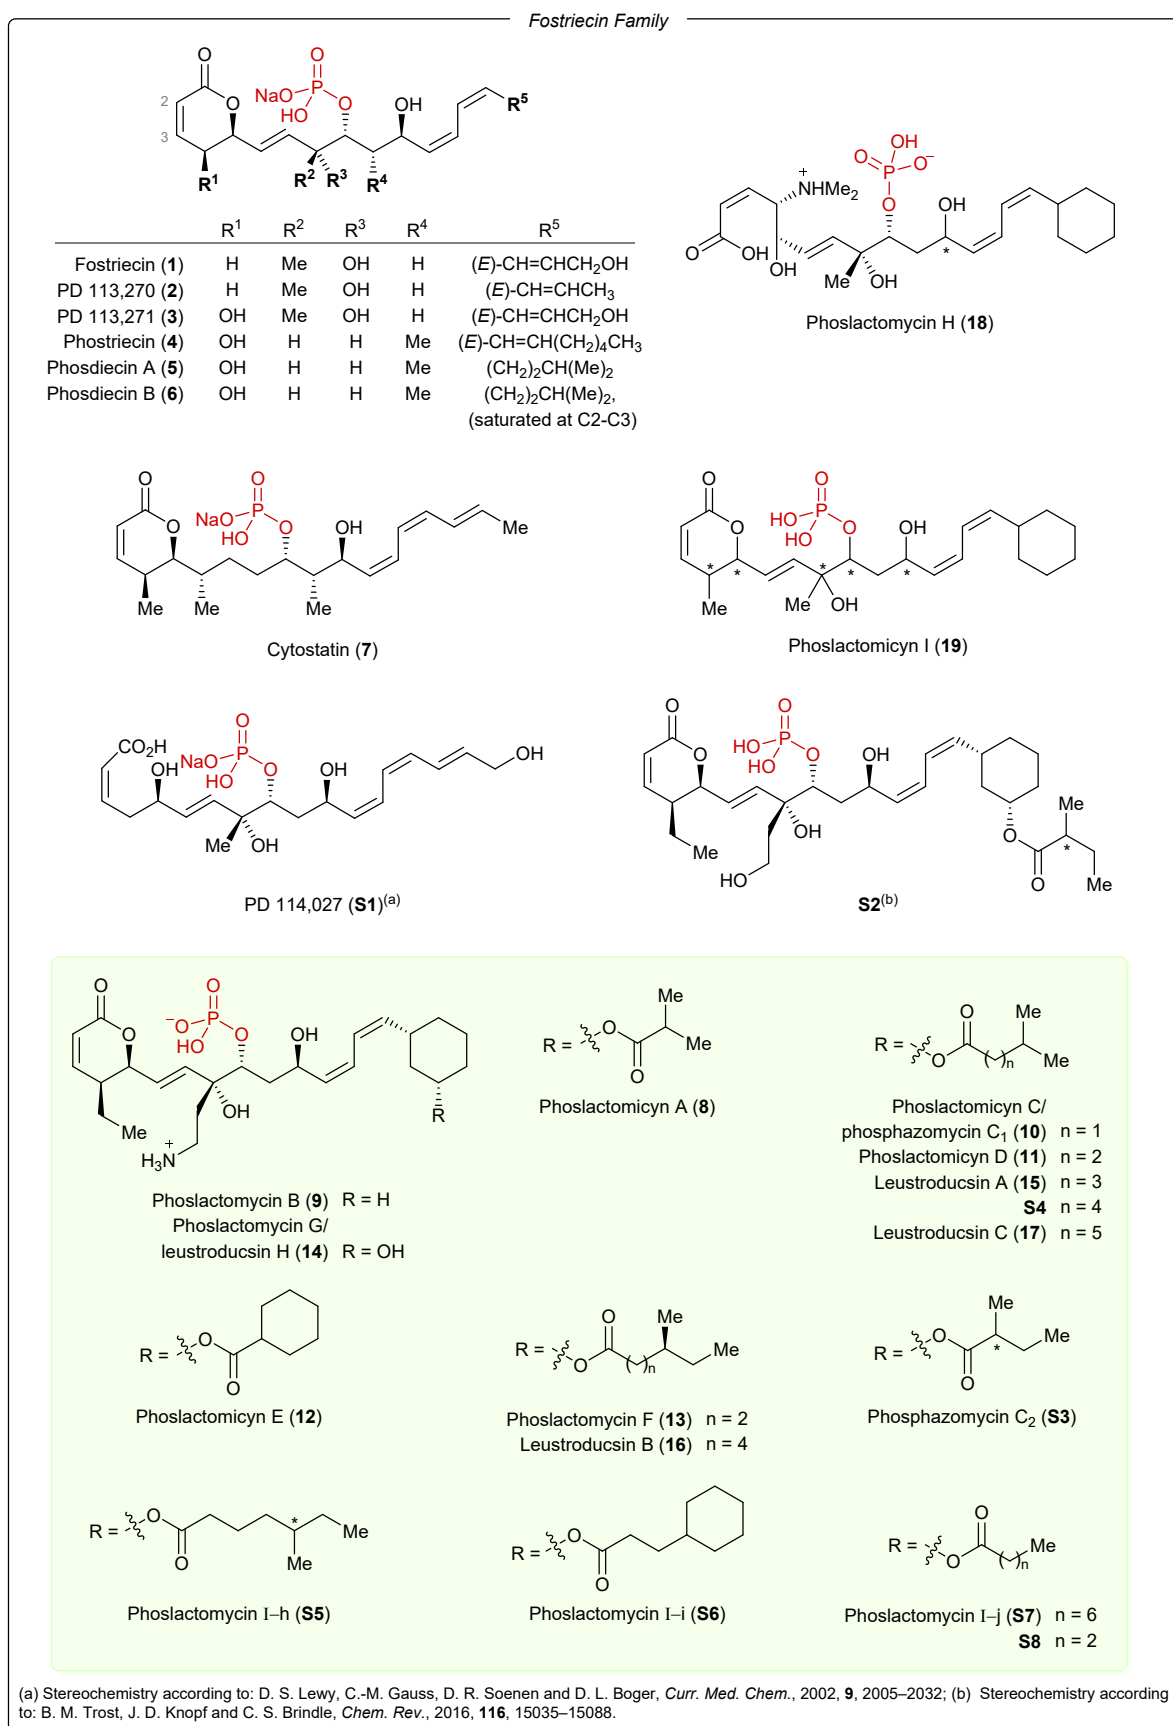

Calyculin Family

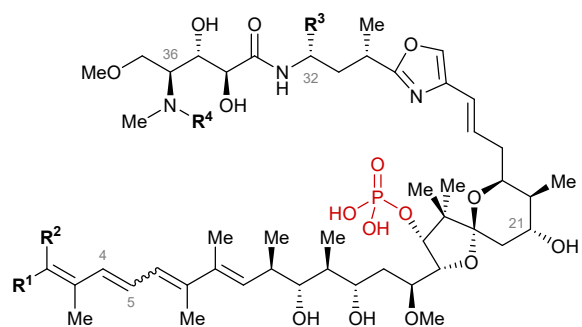

|                                    | C4=C5    | R <sup>1</sup>    | R <sup>2</sup>    | R <sup>3</sup> | R <sup>4</sup> |
|------------------------------------|----------|-------------------|-------------------|----------------|----------------|
| Calyculin A (23)                   | <i>E</i> | H                 | CN                | H              | Me             |
| Calyculin B (24)                   | <i>E</i> | CN                | H                 | H              | Me             |
| Calyculin C (25)                   | <i>E</i> | H                 | CN                | Me             | Me             |
| Calyculin D (26)                   | <i>E</i> | CN                | H                 | Me             | Me             |
| Calyculin E (27)                   | <i>Z</i> | H                 | CN                | H              | Me             |
| Calyculin F (28)                   | <i>Z</i> | CN                | H                 | H              | Me             |
| Calyculin G (29)                   | <i>Z</i> | H                 | CN                | Me             | Me             |
| Calyculin H (30)                   | <i>Z</i> | CN                | H                 | Me             | Me             |
| des- <i>N</i> -Me Calyculin A (31) | <i>E</i> | H                 | CN                | H              | H              |
| Calyculinamide A (32)              | <i>E</i> | H                 | CONH <sub>2</sub> | H              | Me             |
| Calyculinamide B (33)              | <i>E</i> | CONH <sub>2</sub> | H                 | H              | Me             |
| Calyculinamide F (34)              | <i>Z</i> | H                 | CONH <sub>2</sub> | H              | Me             |

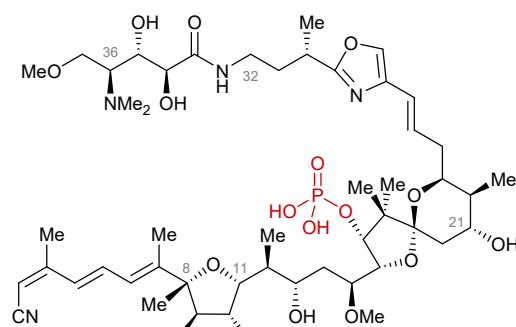

Calyculin J (38)

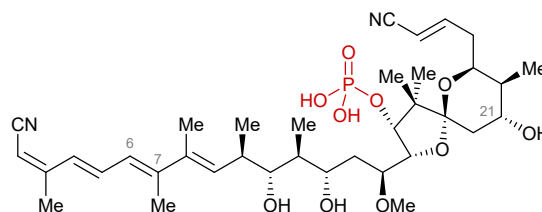

Hemicalyculin A (39)

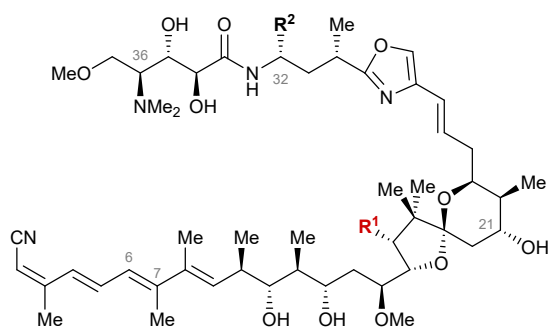

|                             | R <sup>1</sup>                                | R <sup>2</sup> |
|-----------------------------|-----------------------------------------------|----------------|
| Dephosphonocalyculin A (35) | OH                                            | H              |
| Phosphocalyculin A (36)     | OP <sub>2</sub> O <sub>6</sub> H <sub>3</sub> | H              |
| Phosphocalyculin C (37)     | OP <sub>2</sub> O <sub>6</sub> H <sub>3</sub> | Me             |

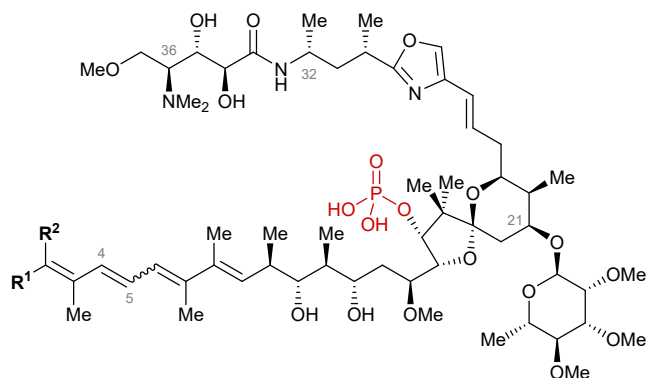

|                  | C4=C5    | R <sup>1</sup>    | R <sup>2</sup>    |
|------------------|----------|-------------------|-------------------|
| Clavosine A (40) | <i>E</i> | H                 | CONH <sub>2</sub> |
| Clavosine B (41) | <i>E</i> | CONH <sub>2</sub> | H                 |
| Clavosine C (42) | <i>Z</i> | CONH <sub>2</sub> | H                 |

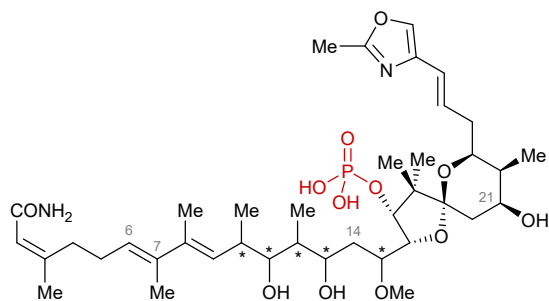

Geometricin A (43)

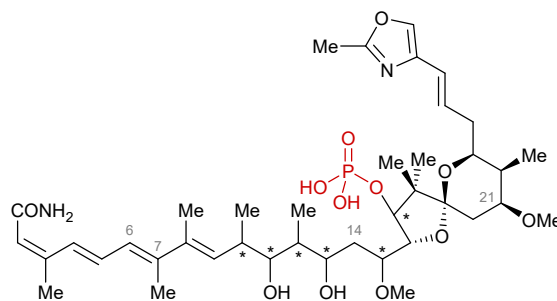

Swinhoeiamide A (44)

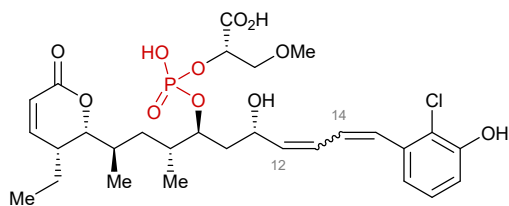

Franklinolide A (**20**) 12Z, 14Z  
 Franklinolide B (**21**) 12E, 14E  
 Franklinolide C (**22**) 12E, 14Z

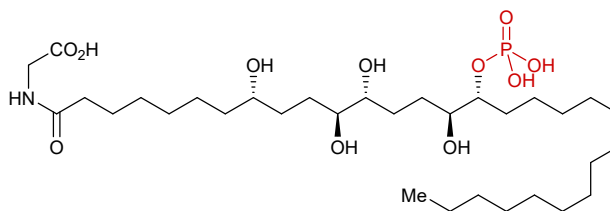

Phosphoeleganin (**45**)

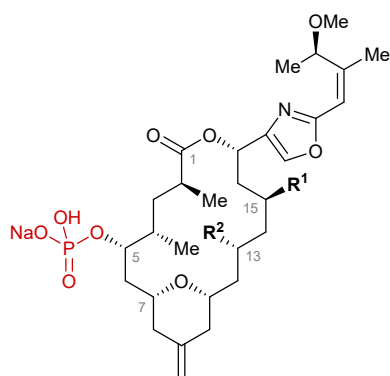

|                                             | R <sup>1</sup> | R <sup>2</sup> |
|---------------------------------------------|----------------|----------------|
| Enigmazole A ( <b>46</b> )                  | OH             | H              |
| 15-O-Methylenigmazole A ( <b>47</b> )       | OMe            | H              |
| 13-OH-15-O-Methylenigmazole A ( <b>48</b> ) | OMe            | OH             |

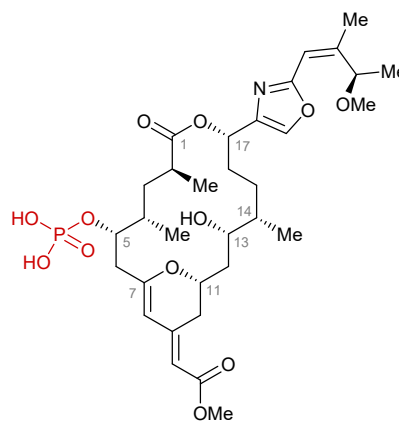

Proposed structure of  
 (-)-Enigmazole B (**S9**)

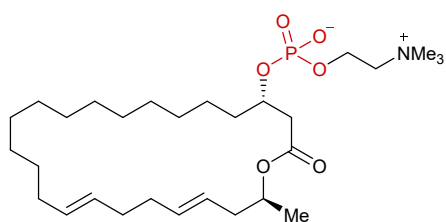

Eushearilide (**49**)

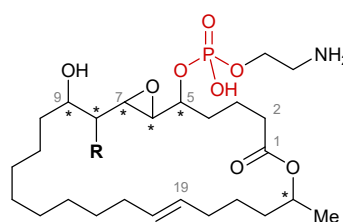

|                       | R  | H6-H7        |
|-----------------------|----|--------------|
| JBIR-19 ( <b>50</b> ) | OH | <i>trans</i> |
| JBIR-20 ( <b>51</b> ) | H  | <i>cis</i>   |

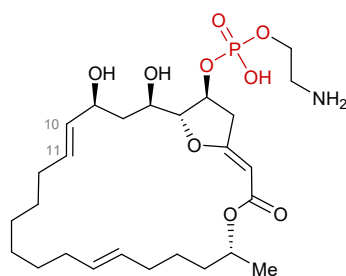

Preussolide A (**52**) (saturated at C10-C11)  
 Preussolide B (**53**)

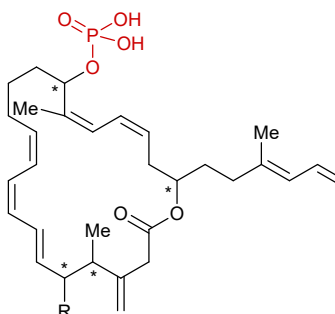

|                              | R  |
|------------------------------|----|
| Difficidin ( <b>S10</b> )    | H  |
| Oxydifficidin ( <b>S11</b> ) | OH |

\*Absolute configuration not determined.

**Figure S2. Alkaloids and Related Secondary Metabolites**

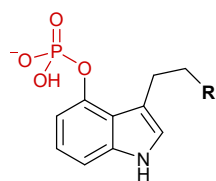

|                             | R                               |
|-----------------------------|---------------------------------|
| Psilocybin ( <b>54</b> )    | NHMe <sub>2</sub> <sup>+</sup>  |
| Baeocystin ( <b>57</b> )    | NH <sub>2</sub> Me <sup>+</sup> |
| Norbaeocystin ( <b>58</b> ) | NH <sub>3</sub> <sup>+</sup>    |
| Aeruginascin ( <b>59</b> )  | NMe <sub>3</sub> <sup>+</sup>   |

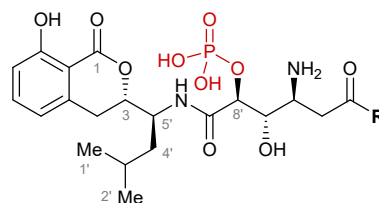

|                                          | R               |
|------------------------------------------|-----------------|
| Amicoumacin A 8'-phosphate ( <b>60</b> ) | NH <sub>2</sub> |
| Amicoumacin B 8'-phosphate ( <b>61</b> ) | OH              |

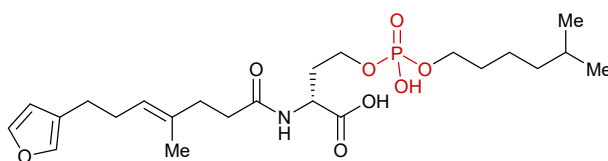

Pokepola ester (**S12**)

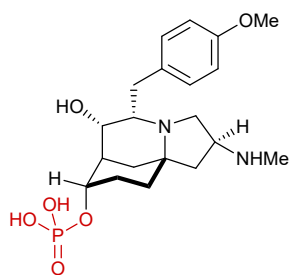

FR901483 (**64**)

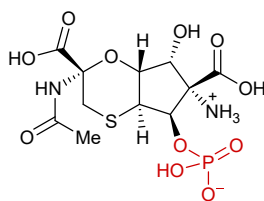

Tagetitoxin (**65**)

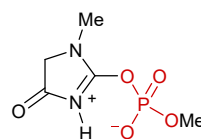

Ulosantoin (**S13**)

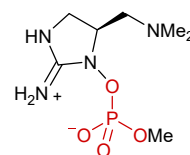

Guanitoxin/anatoxin-a(S) (**S14**)

Figure S3. Peptides

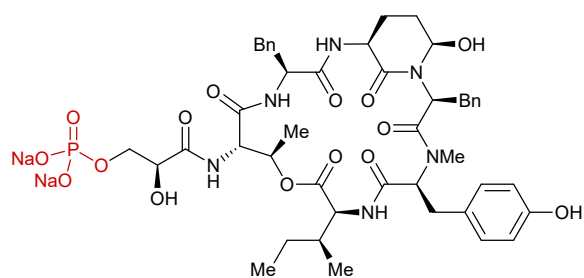

Micropeptin T-20 (**66**)  
(Putative structure)

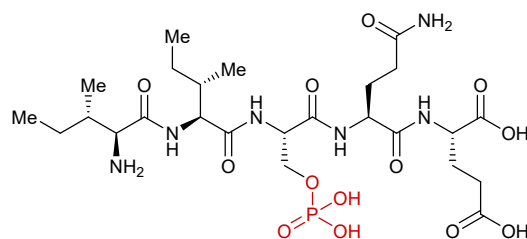

Alphostatin (**S15**)

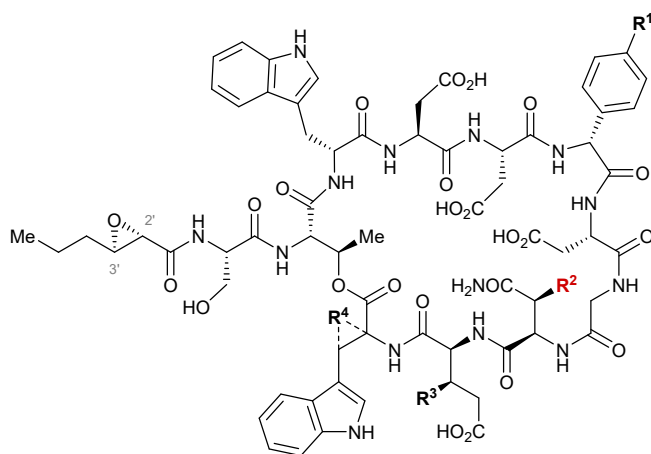

|                      | R <sup>1</sup> | R <sup>2</sup>                  | R <sup>3</sup> | R <sup>4</sup> |
|----------------------|----------------|---------------------------------|----------------|----------------|
| CDA1b ( <b>67</b> )  | OH             | OPO <sub>3</sub> H <sub>2</sub> | H              | H,H            |
| CDA2a ( <b>68</b> )  | OH             | OPO <sub>3</sub> H <sub>2</sub> | Me             | π-bond         |
| CDA2b ( <b>69</b> )  | OH             | OPO <sub>3</sub> H <sub>2</sub> | Me             | H,H            |
| CDA2d ( <b>70</b> )  | H              | OPO <sub>3</sub> H <sub>2</sub> | Me             | H,H            |
| CDA2fa ( <b>75</b> ) | F              | OPO <sub>3</sub> H <sub>2</sub> | Me             | π-bond         |
| CDA2fb ( <b>76</b> ) | F              | OPO <sub>3</sub> H <sub>2</sub> | Me             | H,H            |

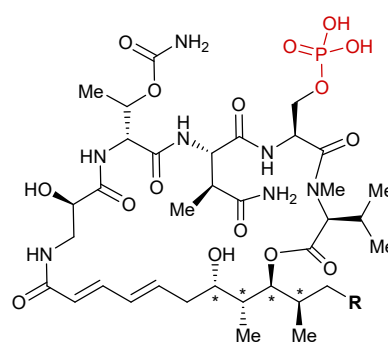

|                            | R  |
|----------------------------|----|
| Celebeside A ( <b>77</b> ) | Et |
| Celebeside B ( <b>78</b> ) | Me |

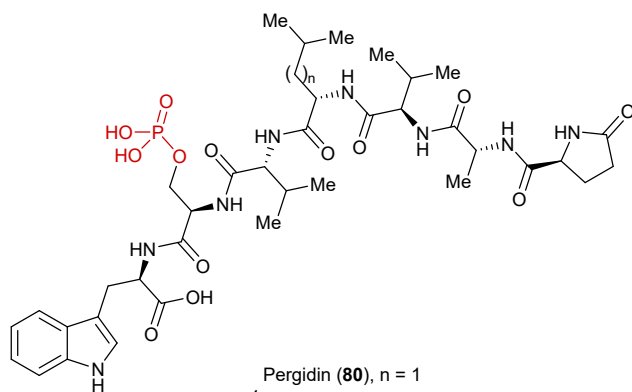

Pergidin (**80**), n = 1  
Val<sup>4</sup>-pergidin (**81**), n = 0

\*Absolute configuration not determined.

Figure S4. Carbohydrate-based Secondary Metabolites

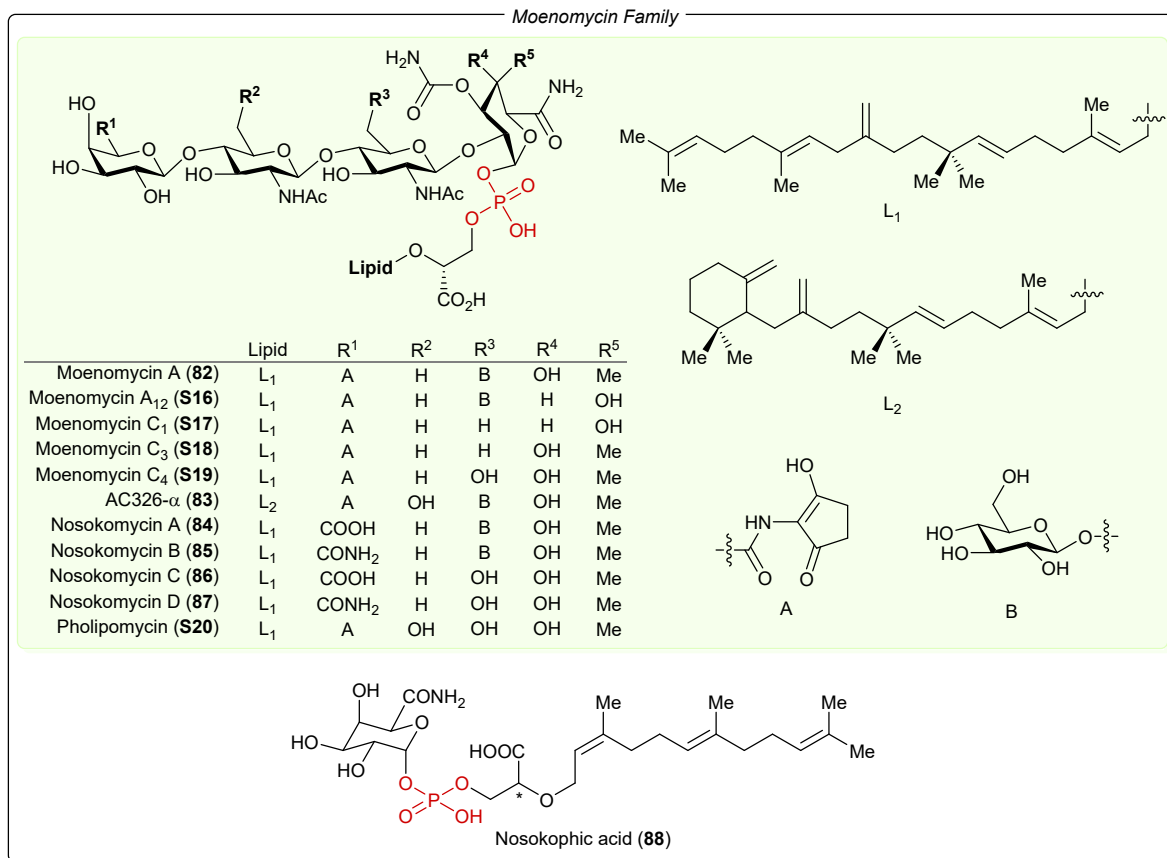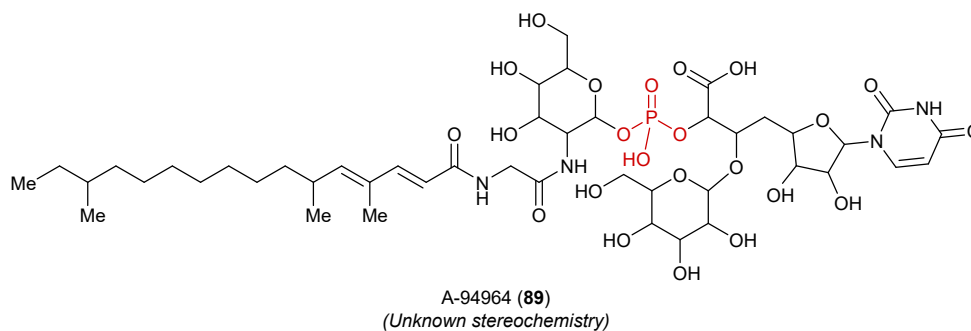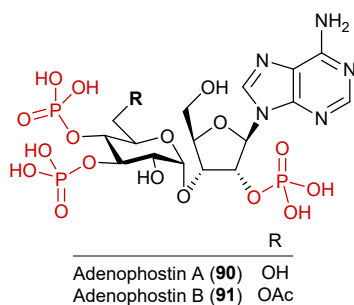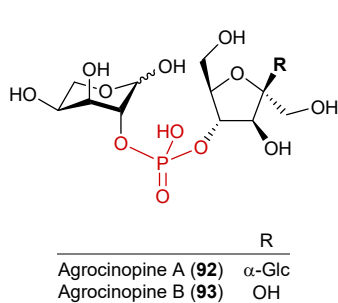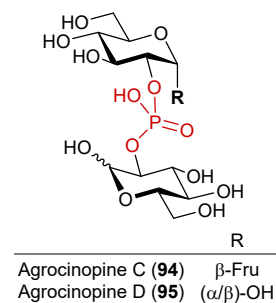



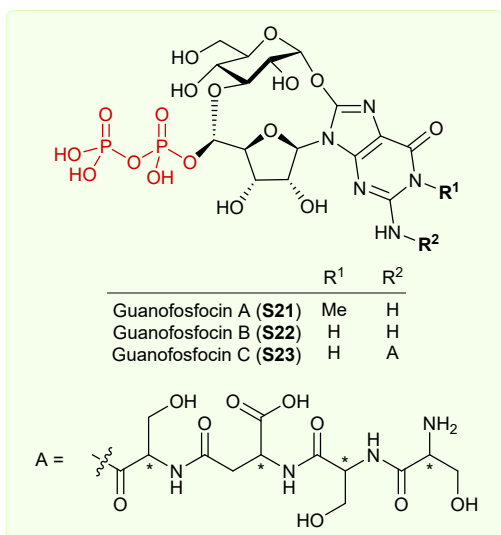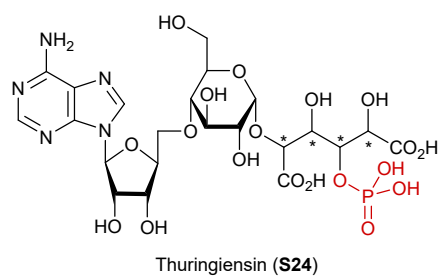

\*Absolute configuration not determined.

**Figure S5: Enolphosphates**

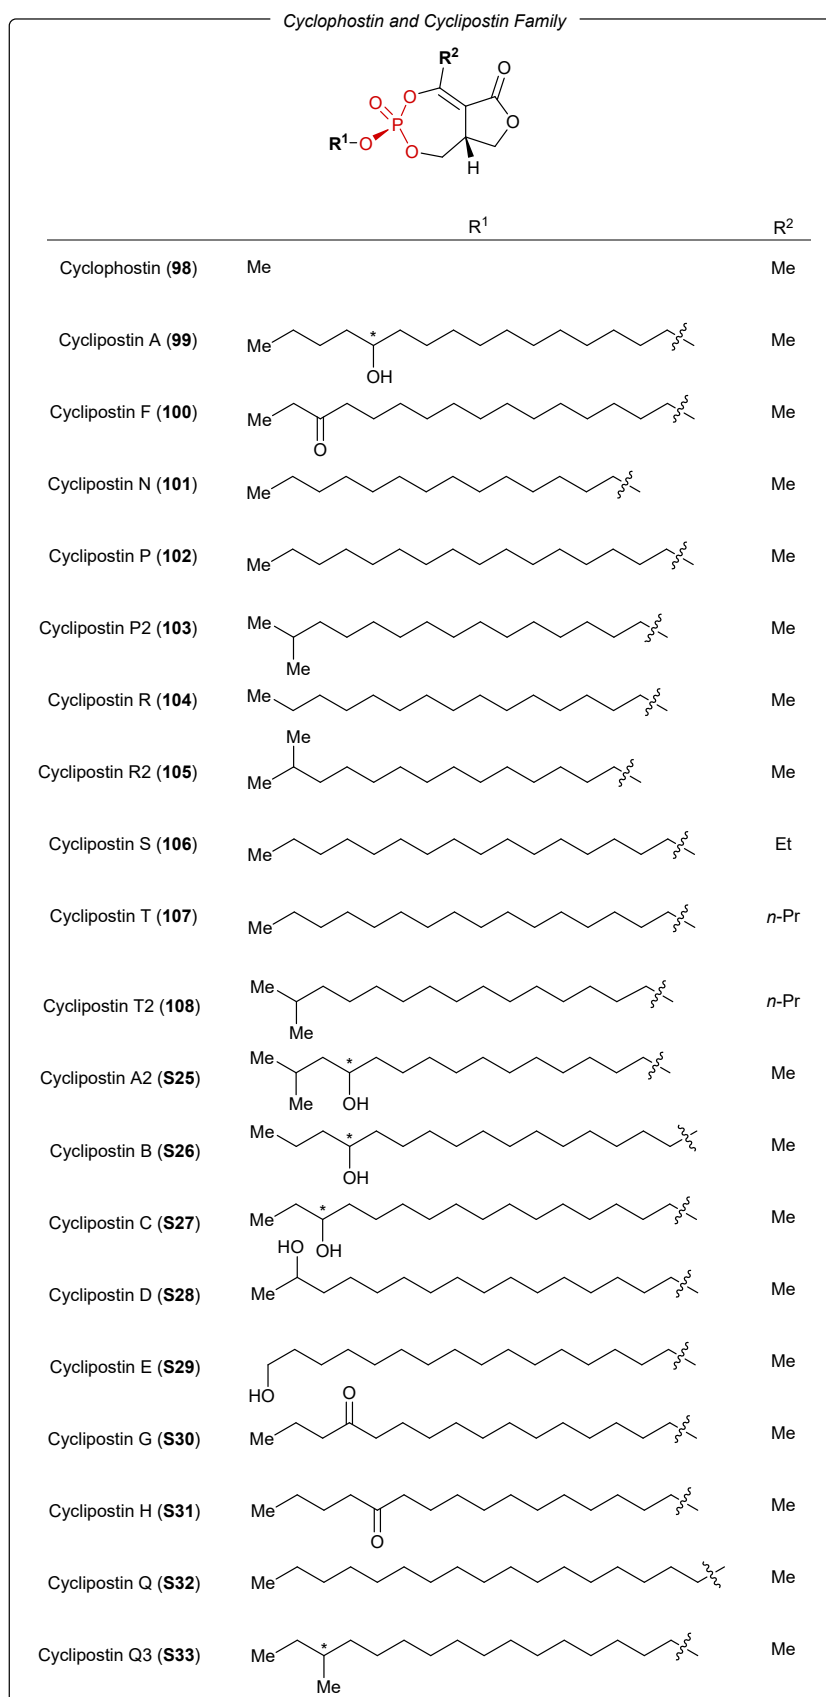

Salinipostin Family

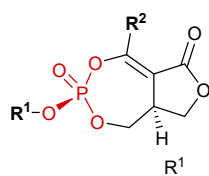

|                      | R <sup>1</sup> | R <sup>2</sup> |
|----------------------|----------------|----------------|
| Salinipostin A (109) | Me-            | <i>n</i> -Bu   |
| Salinipostin B (110) | Me-            | <i>n</i> -Bu   |
| Salinipostin C (111) | Me-            | <i>n</i> -Bu   |
| Salinipostin D (112) | Me-            | <i>i</i> -Bu   |
| Salinipostin E (113) | Me-            | <i>i</i> -Bu   |
| Salinipostin F (114) | Me-            | <i>n</i> -Pr   |
| Salinipostin G (115) | Me-            | <i>n</i> -Pr   |
| Salinipostin H (116) | Me-            | <i>n</i> -Pr   |
| Salinipostin I (117) | Me-            | Et             |
| Salinipostin J (118) | Me-            | Et             |
| Salinipostin K (119) | Me-            | Et             |

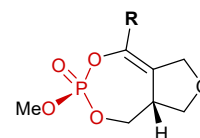

CGA 134,735 (96) R = *n*-C<sub>3</sub>H<sub>7</sub>  
 CGA 134,736 (97) R = Me

\*Absolute configuration not determined.

**Figure S6. Lipid-based Secondary Metabolites**

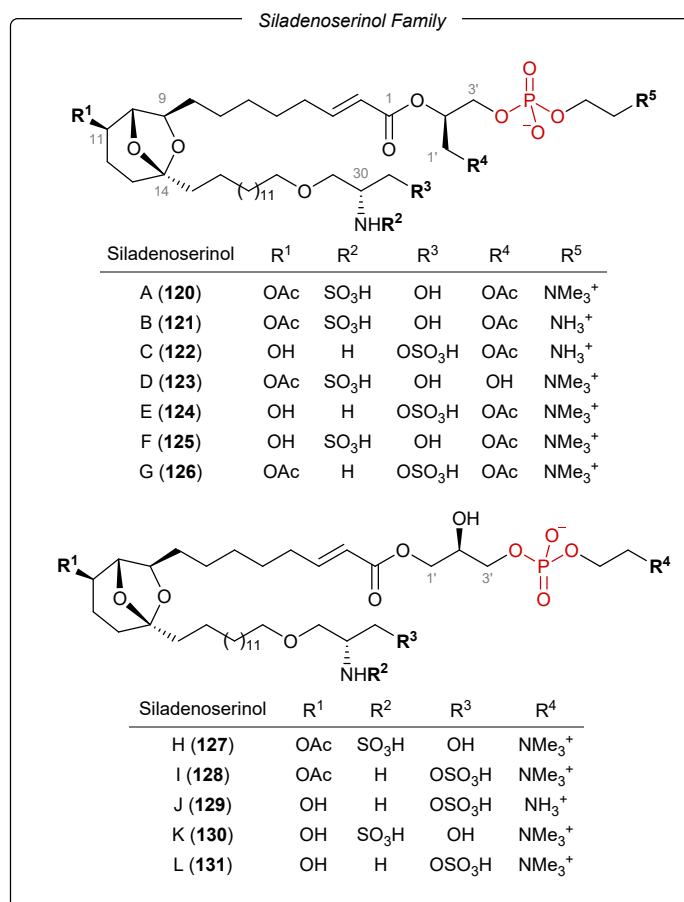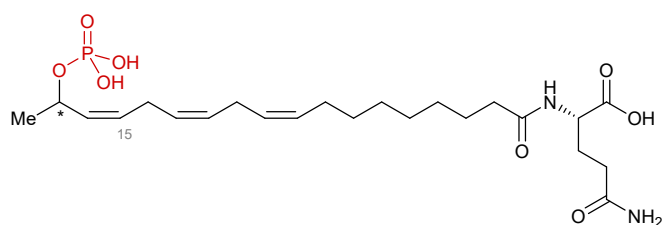

*N*-(17-Phosphonoxylinolenoyl)-L-glutamine (**132**)  
*N*-(17-phosphonoxylinoleoyl)-L-glutamine (**133**) (saturated at C15-C16)

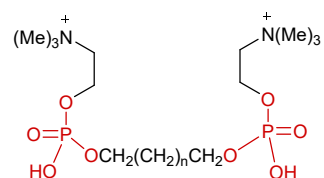

Irlbacholine (**135**) n = 20  
 Gentialine A (**136**) n = 19  
 Gentialine B (**137**) n = 21  
 Gentialine C (**138**) n = 22

\*Absolute configuration not determined.

Figure S7. Steroids

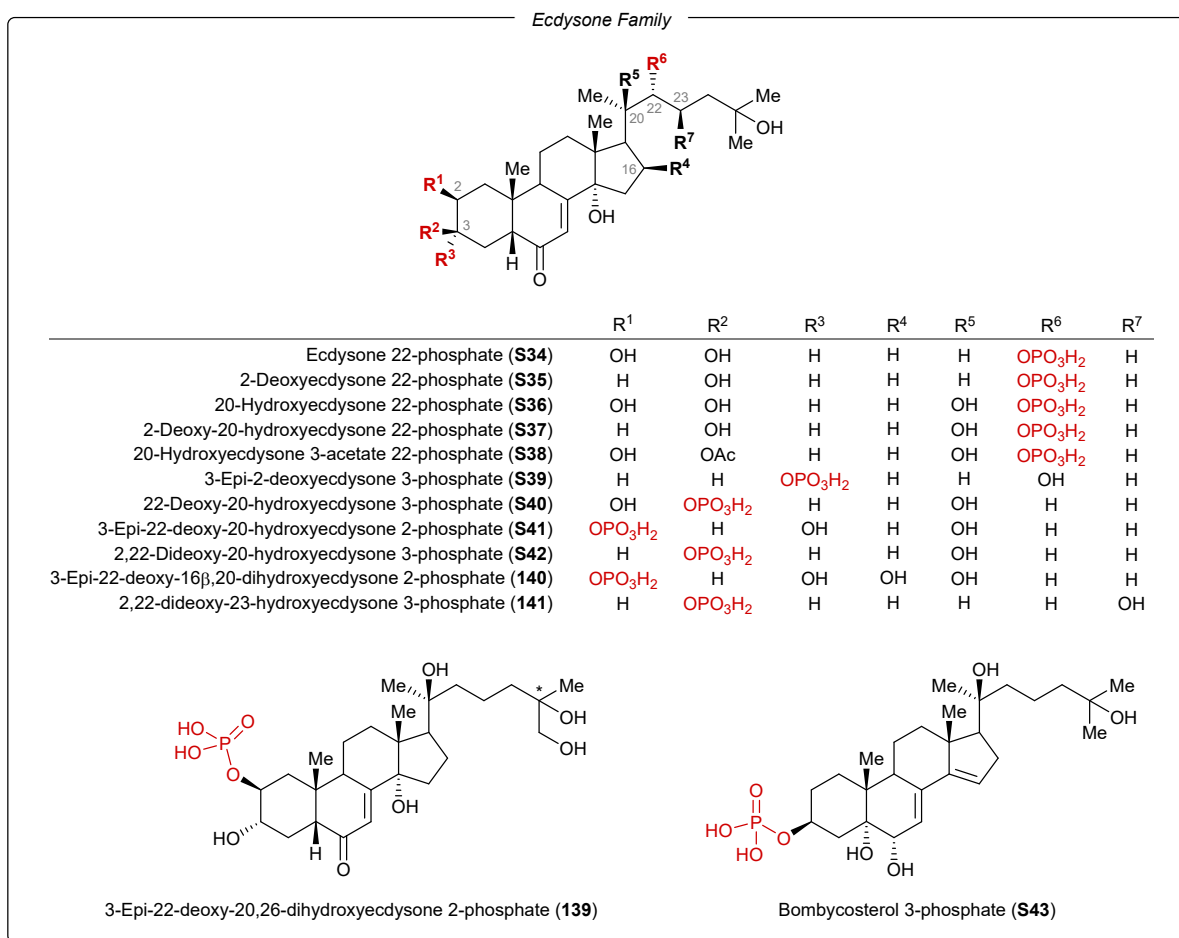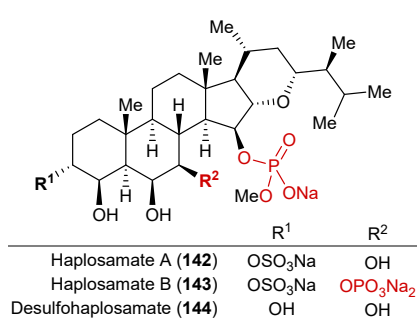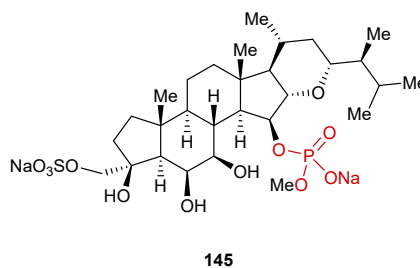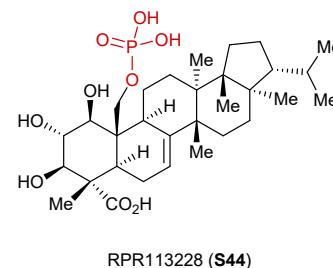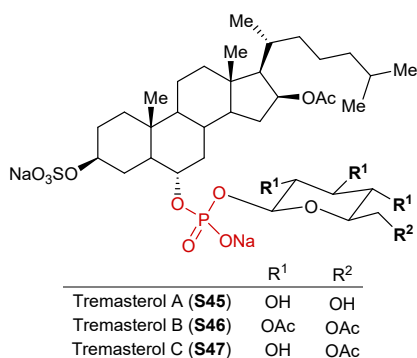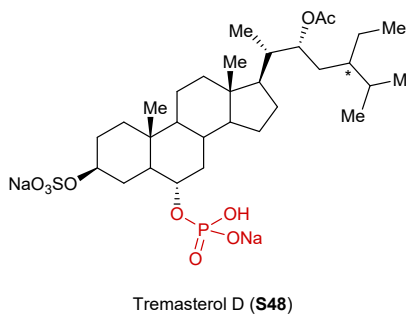

\*Absolute configuration not determined.

**Table S1. Natural sources of phosphorylated secondary metabolites (extended)**

| Class       | Natural Products                                                     | Source                                                                                                                                                                                          | Ref.              |
|-------------|----------------------------------------------------------------------|-------------------------------------------------------------------------------------------------------------------------------------------------------------------------------------------------|-------------------|
| Polyketides | Fostriecin (1)<br>PD 113,270 (2)<br>PD 113,271 (3)                   | <i>Streptomyces pulveraceus</i> ATCC 31906                                                                                                                                                      | 1-5               |
|             | PD 114,027 (S1)                                                      | <i>Streptomyces pulveraceus</i> ATCC 31906                                                                                                                                                      | 2, 6, 7           |
|             | Phostriecin (aka Sultriestin) (4)                                    | <i>Streptomyces roseiscleroticus</i> L827-7<br>ATCC 53903                                                                                                                                       | 8, 9              |
|             | Phosdiecin A (5)<br>Phosdiecin B (6)                                 | <i>Streptomyces</i> sp. SS99BA-2                                                                                                                                                                | 10                |
|             | S2 (unnamed compound)                                                | <i>Streptomyces hygroscopicus</i> MA-5000                                                                                                                                                       | 11                |
|             | Cytostatin (7)                                                       | <i>Streptomyces</i> sp. MJ654-NF4                                                                                                                                                               | 12, 13            |
|             | Phosphazomycin A (structure has not yet been reported)               | <i>Streptomyces</i> sp. HK-803                                                                                                                                                                  | 14                |
|             | Phoslactomycin A (8)                                                 | <i>Streptomyces nigrescens</i> SC-273                                                                                                                                                           | 15, 16            |
|             | Phoslactomycin B (Phospholine) (9)                                   | <i>Streptomyces nigrescens</i> SC-273;<br><i>Streptomyces hygroscopicus</i>                                                                                                                     | 15-18             |
|             | Phoslactomycin C/Phosphazomycin C <sub>1</sub> (10)                  | <i>Streptomyces</i> sp. HK-803;<br><i>Streptomyces nigrescens</i> SC-273                                                                                                                        | 15, 16,<br>19     |
|             | Phosphazomycin C <sub>2</sub> (S3)                                   | <i>Streptomyces</i> sp. HK-803                                                                                                                                                                  | 19                |
|             | Phoslactomycin D (11)                                                | <i>Streptomyces nigrescens</i> SC-273                                                                                                                                                           | 15, 16            |
|             | Phoslactomycin E (12)                                                | <i>Streptomyces nigrescens</i> SC-273;<br><i>Streptomyces</i> sp. HA81-2                                                                                                                        | 15, 16,<br>20     |
|             | Phoslactomycin F (13)                                                | <i>Streptomyces nigrescens</i> SC-273;<br><i>Streptomyces platensis</i> SANK 60191                                                                                                              | 15, 16,<br>21-23  |
|             | Phoslactomycin G/Leustroducsin H (14)                                | <i>Streptomyces</i> sp. HK 803                                                                                                                                                                  | 24                |
|             | Leustroducsin A (15)<br>Leustroducsin B (16)<br>Leustroducsin C (17) | <i>Streptomyces platensis</i> SANK 60191                                                                                                                                                        | 21-23             |
|             | Phoslactomycin H (18)<br>Phoslactomycin I (19)                       | <i>Streptomyces</i> sp. MLA1839                                                                                                                                                                 | 25                |
|             | S4 (unnamed compound)                                                | <i>Streptomyces platensis</i> SAM-0654                                                                                                                                                          | 26                |
|             | I-h (S5)<br>I-i (S6)<br>I-j (S7)                                     | <i>Streptomyces platensis</i> SANK 60191                                                                                                                                                        | 21, 22            |
|             | S8 (unnamed compound)                                                | <i>Streptomyces platensis</i> SAM-0654                                                                                                                                                          | 26                |
|             | Franklinolide A (20)                                                 | Australian marine sponge CMB-01989;<br><i>Bahamian sponge Plakina jamaicensis</i>                                                                                                               | 27, 28            |
|             | Franklinolide B (21)<br>Franklinolide C (22)                         | Australian marine sponge CMB-01989                                                                                                                                                              | 27                |
|             | (-)-Enigmazole B (S9)                                                | <i>Cinachyrella enigmatica</i>                                                                                                                                                                  | 29                |
|             | Difficidin (S10)                                                     | <i>Bacillus subtilis</i> ATCC 39320;<br><i>Bacillus subtilis</i> ATCC 39374;<br><i>Bacillus subtilis</i> A1/3;<br><i>Bacillus amyloliquefaciens</i> ;<br><i>Bacillus methylotrophicus</i> DR-08 | 30-35             |
|             | Oxydifficidin (S11)                                                  | <i>Bacillus subtilis</i> ATCC 39320;<br><i>Bacillus subtilis</i> ATCC 39374;<br><i>Bacillus subtilis</i> A1/3;<br><i>Bacillus amyloliquefaciens</i> ;<br><i>Bacillus methylotrophicus</i> DR-08 | 30, 31,<br>33, 35 |
|             | Calyculin A (23)                                                     | <i>Discodermia calyx</i> ;<br><i>Lamellomorpha strongylata</i>                                                                                                                                  | 36, 37            |
|             | Calyculin B (24)                                                     | <i>Discodermia calyx</i> ;<br><i>Lamellomorpha strongylata</i>                                                                                                                                  | 37, 38            |
|             | Calyculin C (25)                                                     | <i>Discodermia calyx</i>                                                                                                                                                                        | 38                |
|             | Calyculin D (26)                                                     | <i>Discodermia calyx</i>                                                                                                                                                                        | 38                |
|             | Calyculin E (27)                                                     | <i>Lamellomorpha strongylata</i> ;                                                                                                                                                              | 37, 39,           |

|                                                    |                                                                                                                |                                                                                                                                                                                                                                                                                                                                                                                                                                                                                                                                                                                                                                    |                 |
|----------------------------------------------------|----------------------------------------------------------------------------------------------------------------|------------------------------------------------------------------------------------------------------------------------------------------------------------------------------------------------------------------------------------------------------------------------------------------------------------------------------------------------------------------------------------------------------------------------------------------------------------------------------------------------------------------------------------------------------------------------------------------------------------------------------------|-----------------|
|                                                    |                                                                                                                | <i>Discodermia</i> sp.;<br><i>Discodermia calyx</i>                                                                                                                                                                                                                                                                                                                                                                                                                                                                                                                                                                                | 40              |
|                                                    | Calyculin F (28)                                                                                               | <i>Lamellomorpha strongylata</i> ;<br><i>Discodermia</i> sp.;<br><i>Discodermia calyx</i>                                                                                                                                                                                                                                                                                                                                                                                                                                                                                                                                          | 37, 39,<br>40   |
|                                                    | Calyculin G (29)                                                                                               | <i>Discodermia calyx</i>                                                                                                                                                                                                                                                                                                                                                                                                                                                                                                                                                                                                           | 40              |
|                                                    | Calyculin H (30)                                                                                               | <i>Discodermia calyx</i>                                                                                                                                                                                                                                                                                                                                                                                                                                                                                                                                                                                                           | 40              |
|                                                    | Des- <i>N</i> -methylcalyculin A (31)                                                                          | <i>Discodermia calyx</i>                                                                                                                                                                                                                                                                                                                                                                                                                                                                                                                                                                                                           | 41              |
|                                                    | Calyculinamide A (32)                                                                                          | <i>Lamellomorpha strongylata</i> ;<br><i>Discodermia calyx</i>                                                                                                                                                                                                                                                                                                                                                                                                                                                                                                                                                                     | 37, 41          |
|                                                    | Calyculinamide B (33)                                                                                          | <i>Lamellomorpha strongylata</i>                                                                                                                                                                                                                                                                                                                                                                                                                                                                                                                                                                                                   | 37              |
|                                                    | Calyculinamide F (34)                                                                                          | <i>Discodermia calyx</i>                                                                                                                                                                                                                                                                                                                                                                                                                                                                                                                                                                                                           | 41              |
|                                                    | Phosphocalyculin A (36)                                                                                        | <i>Discodermia calyx</i>                                                                                                                                                                                                                                                                                                                                                                                                                                                                                                                                                                                                           | 42, 43          |
|                                                    | Phosphocalyculin C (37)                                                                                        | <i>Discodermia calyx</i>                                                                                                                                                                                                                                                                                                                                                                                                                                                                                                                                                                                                           | 42              |
|                                                    | Calyculin J (38)                                                                                               | <i>Discodermia calyx</i>                                                                                                                                                                                                                                                                                                                                                                                                                                                                                                                                                                                                           | 41              |
|                                                    | Hemicalyculin A (39)                                                                                           | <i>Discodermia calyx</i>                                                                                                                                                                                                                                                                                                                                                                                                                                                                                                                                                                                                           | 44              |
|                                                    | Clavosine A (40)<br>Clavosine B (41)<br>Clavosine C (42)                                                       | <i>Myriastrra clavosa</i>                                                                                                                                                                                                                                                                                                                                                                                                                                                                                                                                                                                                          | 45              |
|                                                    | Geometricin A (43)                                                                                             | <i>Luffariella geometrica</i>                                                                                                                                                                                                                                                                                                                                                                                                                                                                                                                                                                                                      | 46              |
|                                                    | Swinhoeiamide A (44)                                                                                           | <i>Theonella swinhoei</i>                                                                                                                                                                                                                                                                                                                                                                                                                                                                                                                                                                                                          | 47, 48          |
|                                                    | Phosphoeleganin (45)                                                                                           | <i>Sidnyum elegans</i>                                                                                                                                                                                                                                                                                                                                                                                                                                                                                                                                                                                                             | 49, 50          |
|                                                    | Enigmazole A (46)<br>15- <i>O</i> -Methylenigmazole A (47)<br>13-Hydroxy-15- <i>O</i> -methylenigmazole A (48) | <i>Cinachyrella enigmatica</i>                                                                                                                                                                                                                                                                                                                                                                                                                                                                                                                                                                                                     | 51              |
|                                                    | Eushearilide (49)                                                                                              | <i>Eupenicillium shearii</i> IFM54447                                                                                                                                                                                                                                                                                                                                                                                                                                                                                                                                                                                              | 52, 53          |
|                                                    | JBIR-19 (50)<br>JBIR-20 (51)                                                                                   | <i>Metarhizium</i> sp. fE61                                                                                                                                                                                                                                                                                                                                                                                                                                                                                                                                                                                                        | 54              |
|                                                    | Preussolide A (52)<br>Preussolide B (53)                                                                       | <i>Preussia typharum</i>                                                                                                                                                                                                                                                                                                                                                                                                                                                                                                                                                                                                           | 55              |
| <b>Alkaloids and Related Secondary Metabolites</b> | Psilocybin (54)                                                                                                | <i>Psilocybe argentipes</i> ;<br><i>Psilocybe baeocystis</i> ;<br><i>Psilocybe cubensis</i> ;<br><i>Inocybe</i> (Fr.) Fr.;<br><i>Psilocybe semilanceata</i> ;<br><i>Psilocybe medullosa</i> ;<br><i>Psilocybe mexicana</i> ;<br><i>Psilocybe cyanescens</i> ;<br><i>Psilocybe bohémica</i> Sebek;<br><i>Psilocybe liniformans</i> ;<br><i>Panaeolus subbalteatus</i> ;<br><i>Panaeolus cyanescens</i> ;<br><i>Inocybe aeruginascens</i> ;<br><i>Inocybe corydalina</i> ;<br><i>Inocybe coelestium</i> ;<br><i>Inocybe haemacta</i> ;<br><i>Gymnopilus purpuratus</i> ;<br><i>Pluteus salicinus</i> ;<br><i>Pholiotina cyanopus</i> | 56-69           |
|                                                    | Baeocystin (57)                                                                                                | <i>Psilocybe baeocystis</i> ;<br><i>Psilocybe semilanceata</i> ;<br><i>Psilocybe cubensis</i> ;<br><i>Psilocybe bohémica</i> ;<br><i>Inocybe</i> (Fr.) Fr.;<br><i>Pholiotina cyanopus</i> ;<br><i>Inocybe aeruginascens</i> ;<br><i>Gymnopilus purpuratus</i> ;<br><i>Panaeolus cyanescens</i>                                                                                                                                                                                                                                                                                                                                     | 56-62,<br>70-72 |
|                                                    | Norbaeocystin (58)                                                                                             | <i>Psilocybe baeocystis</i> ;                                                                                                                                                                                                                                                                                                                                                                                                                                                                                                                                                                                                      | 58, 59,         |

|                 |                                                                    |                                                                                                                                                                                                                                                                                                                                                                                                                                                                                                                                                                                                                                                                                                                                                                                                                                                                                                                                                                                                                              |           |
|-----------------|--------------------------------------------------------------------|------------------------------------------------------------------------------------------------------------------------------------------------------------------------------------------------------------------------------------------------------------------------------------------------------------------------------------------------------------------------------------------------------------------------------------------------------------------------------------------------------------------------------------------------------------------------------------------------------------------------------------------------------------------------------------------------------------------------------------------------------------------------------------------------------------------------------------------------------------------------------------------------------------------------------------------------------------------------------------------------------------------------------|-----------|
|                 |                                                                    | <i>Psilocybe cubensis</i> ;<br><i>Pholiotina cyanopus</i>                                                                                                                                                                                                                                                                                                                                                                                                                                                                                                                                                                                                                                                                                                                                                                                                                                                                                                                                                                    | 71        |
|                 | Aeruginascin (59)                                                  | <i>Inocybe aeruginascens</i> ;<br><i>Psilocybe cubensis</i> ;<br><i>Pholiotina cyanopus</i>                                                                                                                                                                                                                                                                                                                                                                                                                                                                                                                                                                                                                                                                                                                                                                                                                                                                                                                                  | 58-60, 73 |
|                 | Amicoumacin A 8'-phosphate (60)<br>Amicoumacin B 8'-phosphate (61) | <i>Bacillus pumilus</i>                                                                                                                                                                                                                                                                                                                                                                                                                                                                                                                                                                                                                                                                                                                                                                                                                                                                                                                                                                                                      | 74        |
|                 | FR901483 (64)                                                      | <i>Cladobotryum</i> sp. 11231                                                                                                                                                                                                                                                                                                                                                                                                                                                                                                                                                                                                                                                                                                                                                                                                                                                                                                                                                                                                | 75        |
|                 | Tagetitoxin (65)                                                   | <i>Pseudomonas syringae</i> pv. <i>tagetis</i>                                                                                                                                                                                                                                                                                                                                                                                                                                                                                                                                                                                                                                                                                                                                                                                                                                                                                                                                                                               | 76, 77    |
|                 | Pokepola ester (S12)                                               | <i>Spongia oecania</i>                                                                                                                                                                                                                                                                                                                                                                                                                                                                                                                                                                                                                                                                                                                                                                                                                                                                                                                                                                                                       | 78        |
|                 | Ulosantoin (S13)                                                   | <i>Ulosa ruetzleri</i>                                                                                                                                                                                                                                                                                                                                                                                                                                                                                                                                                                                                                                                                                                                                                                                                                                                                                                                                                                                                       | 79        |
|                 | Guanitoxin (aka anatoxin-a(S)) (S14)                               | <i>Anabaena spiroides</i> ;<br><i>Anabaena flos-aquae</i> ;<br><i>Anabaena lemmermannii</i> ;<br><i>Anabaena crassa</i>                                                                                                                                                                                                                                                                                                                                                                                                                                                                                                                                                                                                                                                                                                                                                                                                                                                                                                      | 80-88     |
| <b>Peptides</b> | Micropeptin T-20 (66)                                              | <i>Microcystis aeruginosa</i>                                                                                                                                                                                                                                                                                                                                                                                                                                                                                                                                                                                                                                                                                                                                                                                                                                                                                                                                                                                                | 89, 90    |
|                 | Alphostatin (S15)                                                  | <i>Bacillus megaterium</i> BMG59-R2                                                                                                                                                                                                                                                                                                                                                                                                                                                                                                                                                                                                                                                                                                                                                                                                                                                                                                                                                                                          | 91, 92    |
|                 | CDA1b (67)<br>CDA2a (68)<br>CDA2b (69)                             | <i>Streptomyces coelicolor</i> A3(2) 2377                                                                                                                                                                                                                                                                                                                                                                                                                                                                                                                                                                                                                                                                                                                                                                                                                                                                                                                                                                                    | 93-95     |
|                 | CDA2d (70)<br>CDA2fa (75)<br>CDA2fb (76)                           | <i>Streptomyces coelicolor</i> A3(2)<br>2377 $\Delta$ hmaS mutant                                                                                                                                                                                                                                                                                                                                                                                                                                                                                                                                                                                                                                                                                                                                                                                                                                                                                                                                                            | 94        |
|                 | Celebeside A (77)<br>Celebeside B (78)                             | <i>Siliquariaspongia mirabilis</i>                                                                                                                                                                                                                                                                                                                                                                                                                                                                                                                                                                                                                                                                                                                                                                                                                                                                                                                                                                                           | 96        |
|                 | Pergidin (80)                                                      | <i>Perreyia flavipes</i> ;<br><i>Philomastix macclaei</i> ;<br><i>Lophyrotoma analis</i> ;<br><i>Lophyrotoma interrupta</i> ;<br><i>Lophyrotoma zonalis</i> ;<br><i>Pterygophorus insignis</i> ;<br><i>Pterygophorus nr turneri</i> ;<br><i>Arge nigripes</i> ;<br><i>Arge pagana</i> ;<br><i>Arge aruncus</i> ;<br><i>Arge captiva</i> ;<br><i>Arge dimidiata</i> ;<br><i>Arge enkiathanus</i> ;<br><i>Arge gracilicornis</i> ;<br><i>Arge mali</i> ;<br><i>Arge melanochra</i> ;<br><i>Arge meliosmae</i> ;<br><i>Arge nigripes</i> ;<br><i>Arge nigronodosa</i> ;<br><i>Arge obesa</i> ;<br><i>Arge ochropus</i> ;<br><i>Arge pagana</i> ;<br><i>Arge pullata</i> ;<br><i>Arge rejecta</i> ;<br><i>Arge similis</i> ;<br><i>Arge suspicax</i> ;<br><i>Arge suzukii</i> ;<br><i>Arge ustulata</i> ;<br><i>Arge zonalis</i> ;<br><i>Spinarge affinis</i> ;<br><i>Spinarge fulvicornis</i> ;<br><i>Spinarge nigricornis</i> ;<br><i>Spinarge prunivora</i> ;<br><i>Cibdela janthina</i> ;<br><i>Schizocerella pilicornis</i> | 97-100    |



|                                                         |                                           |                                                                                                                                                                                                                                                                                                                                                                                                                                                                                                                       |                       |
|---------------------------------------------------------|-------------------------------------------|-----------------------------------------------------------------------------------------------------------------------------------------------------------------------------------------------------------------------------------------------------------------------------------------------------------------------------------------------------------------------------------------------------------------------------------------------------------------------------------------------------------------------|-----------------------|
|                                                         | 4-Valinepergidin ( <b>81</b> )            | <i>Philomastix macclaei</i> ;<br><i>Lophyrotoma analis</i> ;<br><i>Lophyrotoma interrupta</i> ;<br><i>Lophyrotoma zonalis</i> ;<br><i>Pterygophorus insignis</i> ;<br><i>Pterygophorus nr turneri</i> ;<br><i>Arge dimidiata</i> ;<br><i>Arge enkianthus</i> ;<br><i>Arge mali</i> ;<br><i>Arge rejecta</i> ;<br><i>Arge similis</i> ;<br><i>Arge suspicax</i> ;<br><i>Arge suzukii</i> ;<br><i>Spinarge affinis</i> ;<br><i>Spinarge fulvicornis</i> ;<br><i>Spinarge nigricornis</i> ;<br><i>Spinarge prunivora</i> | 100                   |
| <b>Carbohydrate-based<br/>Secondary<br/>Metabolites</b> | Moenomycin A ( <b>82</b> )                | <i>Streptomyces ghanaensis</i> ATCC 14672;<br><br><i>Streptomyces bambergiensis</i> ATCC 13879;<br><i>Streptomyces ederensis</i> ATCC 15304;<br><i>Streptomyces geysiriensis</i> ATCC 15303;<br><br>Moenomycin complex (Flavomycin®)                                                                                                                                                                                                                                                                                  | 101-110               |
|                                                         | Moenomycin A <sub>12</sub> ( <b>S16</b> ) | <i>Streptomyces ghanaensis</i> ATCC 14672;<br><br>Moenomycin complex (Flavomycin®)                                                                                                                                                                                                                                                                                                                                                                                                                                    | 103, 104,<br>109, 111 |
|                                                         | Moenomycin C <sub>1</sub> ( <b>S17</b> )  | <i>Streptomyces ghanaensis</i> ATCC 14672;<br><br>Moenomycin complex (Flavomycin®)                                                                                                                                                                                                                                                                                                                                                                                                                                    | 103, 104,<br>109, 112 |
|                                                         | Moenomycin C <sub>3</sub> ( <b>S18</b> )  | <i>Streptomyces ghanaensis</i> ATCC 14672;<br><br>Moenomycin complex (Flavomycin®)                                                                                                                                                                                                                                                                                                                                                                                                                                    | 103, 104,<br>109, 113 |
|                                                         | Moenomycin C <sub>4</sub> ( <b>S19</b> )  | <i>Streptomyces ghanaensis</i> ATCC 14672;<br><br>Moenomycin complex (Flavomycin®)                                                                                                                                                                                                                                                                                                                                                                                                                                    | 103, 104,<br>109, 113 |
|                                                         | AC326-α ( <b>83</b> )                     | unidentified <i>Actinomyces</i> sp. AC326                                                                                                                                                                                                                                                                                                                                                                                                                                                                             | 103, 114              |
|                                                         | Nosokomycin A ( <b>84</b> )               | Moenomycin complex (Flavomycin®);                                                                                                                                                                                                                                                                                                                                                                                                                                                                                     | 103, 109,             |
|                                                         | Nosokomycin B ( <b>85</b> )               | <i>Streptomyces</i> sp. K04-0144                                                                                                                                                                                                                                                                                                                                                                                                                                                                                      | 115, 116              |
|                                                         | Nosokomycin C ( <b>86</b> )               | <i>Streptomyces</i> sp. K04-0144                                                                                                                                                                                                                                                                                                                                                                                                                                                                                      | 103, 115,             |
|                                                         | Nosokomycin D ( <b>87</b> )               |                                                                                                                                                                                                                                                                                                                                                                                                                                                                                                                       | 116                   |
|                                                         | Pholipomycin ( <b>S20</b> )               | <i>Streptomyces livido clavatus</i>                                                                                                                                                                                                                                                                                                                                                                                                                                                                                   | 103, 113,<br>117-121  |
|                                                         | Nosokophic acid ( <b>88</b> )             | <i>Streptomyces</i> sp. K04-0144                                                                                                                                                                                                                                                                                                                                                                                                                                                                                      | 122                   |
|                                                         | A-94964 ( <b>89</b> )                     | <i>Streptomyces</i> sp. SANK 60404                                                                                                                                                                                                                                                                                                                                                                                                                                                                                    | 123, 124              |
|                                                         | Adenophostin A ( <b>90</b> )              | <i>Penicillium brevicompactum</i> SANK 11991;                                                                                                                                                                                                                                                                                                                                                                                                                                                                         | 125-127               |
|                                                         | Adenophostin B ( <b>91</b> )              | <i>Penicillium brevicompactum</i> SANK 12177                                                                                                                                                                                                                                                                                                                                                                                                                                                                          |                       |
|                                                         | Agrocinopine A ( <b>92</b> )              | tumours induced by nopaline strains                                                                                                                                                                                                                                                                                                                                                                                                                                                                                   | 128-130               |
|                                                         | Agrocinopine B ( <b>93</b> )              | tumours induced by nopaline strains                                                                                                                                                                                                                                                                                                                                                                                                                                                                                   | 128                   |
|                                                         | Agrocinopine C ( <b>94</b> )              | tumours induced by agropine strains                                                                                                                                                                                                                                                                                                                                                                                                                                                                                   | 128, 131              |
|                                                         | Agrocinopine D ( <b>95</b> )              | tumours induced by agropine strains                                                                                                                                                                                                                                                                                                                                                                                                                                                                                   | 128                   |
|                                                         | Guanofosfocin A ( <b>S21</b> )            | <i>Streptomyces</i> sp. AB2570                                                                                                                                                                                                                                                                                                                                                                                                                                                                                        | 132                   |
| Guanofosfocin B ( <b>S22</b> )                          | <i>Trichoderma</i> sp. FD5372             | 132                                                                                                                                                                                                                                                                                                                                                                                                                                                                                                                   |                       |
| Guanofosfocin C ( <b>S23</b> )                          | <i>Trichoderma</i> sp. FD5372             | 132                                                                                                                                                                                                                                                                                                                                                                                                                                                                                                                   |                       |
| Thuringiensin (aka β-exotoxin) ( <b>S24</b> )           | <i>Bacillus thuringiensis</i>             | 133-138                                                                                                                                                                                                                                                                                                                                                                                                                                                                                                               |                       |
| <b>Enolphosphates</b>                                   | CGA 134,735 ( <b>96</b> )                 | <i>Streptomyces antibioticus</i> DSM 1951                                                                                                                                                                                                                                                                                                                                                                                                                                                                             | 139                   |

|                                                  |                                                     |                                                                                                                                                                                             |          |
|--------------------------------------------------|-----------------------------------------------------|---------------------------------------------------------------------------------------------------------------------------------------------------------------------------------------------|----------|
|                                                  | CGA 134,736 (97)                                    |                                                                                                                                                                                             |          |
|                                                  | Cyclopostin (98)                                    | <i>Streptomyces lavendulae</i> NK901093                                                                                                                                                     | 140      |
|                                                  | Cyclipostin A (99)                                  | <i>Streptomyces</i> sp. DSM 13381                                                                                                                                                           | 141-143  |
|                                                  | Cyclipostin F (100)                                 |                                                                                                                                                                                             |          |
|                                                  | Cyclipostin N (101)                                 |                                                                                                                                                                                             |          |
|                                                  | Cyclipostin P (102)                                 |                                                                                                                                                                                             |          |
|                                                  | Cyclipostin P2 (103)                                |                                                                                                                                                                                             |          |
|                                                  | Cyclipostin R (104)                                 |                                                                                                                                                                                             |          |
|                                                  | Cyclipostin R2 (105)                                |                                                                                                                                                                                             |          |
|                                                  | Cyclipostin S (106)                                 |                                                                                                                                                                                             |          |
|                                                  | Cyclipostin T (107)                                 |                                                                                                                                                                                             |          |
|                                                  | Cyclipostin T2 (108)                                |                                                                                                                                                                                             |          |
|                                                  | Cyclipostin A2 (S25)*                               |                                                                                                                                                                                             |          |
|                                                  | Cyclipostin B (S26)*                                |                                                                                                                                                                                             |          |
|                                                  | Cyclipostin C (S27)*                                |                                                                                                                                                                                             |          |
|                                                  | Cyclipostin D (S28)*                                |                                                                                                                                                                                             |          |
|                                                  | Cyclipostin E (S29)*                                |                                                                                                                                                                                             |          |
|                                                  | Cyclipostin G (S30)*                                |                                                                                                                                                                                             |          |
|                                                  | Cyclipostin H (S31)*                                |                                                                                                                                                                                             |          |
|                                                  | Cyclipostin Q (S32)*                                |                                                                                                                                                                                             |          |
|                                                  | Cyclipostin Q3 (S33)*                               |                                                                                                                                                                                             |          |
|                                                  | *HPLC detected                                      |                                                                                                                                                                                             |          |
|                                                  | Salinipostin A (109)                                | <i>Salinispora</i> sp. RL08-036-SPS-B                                                                                                                                                       | 144      |
|                                                  | Salinipostin B (110)                                |                                                                                                                                                                                             |          |
|                                                  | Salinipostin C (111)                                |                                                                                                                                                                                             |          |
|                                                  | Salinipostin D (112)                                |                                                                                                                                                                                             |          |
|                                                  | Salinipostin E (113)                                |                                                                                                                                                                                             |          |
|                                                  | Salinipostin F (114)                                |                                                                                                                                                                                             |          |
|                                                  | Salinipostin G(115)                                 |                                                                                                                                                                                             |          |
|                                                  | Salinipostin H (116)                                |                                                                                                                                                                                             |          |
|                                                  | Salinipostin I (117)                                |                                                                                                                                                                                             |          |
|                                                  | Salinipostin J (118)                                |                                                                                                                                                                                             |          |
|                                                  | Salinipostin K (119)                                |                                                                                                                                                                                             |          |
| <b>Lipid-based<br/>Secondary<br/>Metabolites</b> | Siladenoserinol A (120)                             | Didemnidae tunicate                                                                                                                                                                         | 145      |
|                                                  | Siladenoserinol B (121)                             |                                                                                                                                                                                             |          |
|                                                  | Siladenoserinol C (122)                             |                                                                                                                                                                                             |          |
|                                                  | Siladenoserinol D (123)                             |                                                                                                                                                                                             |          |
|                                                  | Siladenoserinol E (124)                             |                                                                                                                                                                                             |          |
| Siladenoserinol F (125)                          |                                                     |                                                                                                                                                                                             |          |
| Siladenoserinol G (126)                          |                                                     |                                                                                                                                                                                             |          |
| Siladenoserinol H (127)                          |                                                     |                                                                                                                                                                                             |          |
| Siladenoserinol I (128)                          |                                                     |                                                                                                                                                                                             |          |
| Siladenoserinol J (129)                          |                                                     |                                                                                                                                                                                             |          |
| Siladenoserinol K (130)                          |                                                     |                                                                                                                                                                                             |          |
| Siladenoserinol L (131)                          |                                                     |                                                                                                                                                                                             |          |
|                                                  | <i>N</i> -(17-Phosphonoxylinolenoyl)glutamine (132) |                                                                                                                                                                                             |          |
|                                                  | <i>N</i> -(17-phosphonoxylinoleoyl)glutamine (133)  |                                                                                                                                                                                             |          |
|                                                  | Irlbacholine (135)                                  | <i>Irlbachia alata</i> ;<br><i>Anthocleista djalonensis</i> ;<br><i>Gentiana crassicaulis</i> ;<br><i>Gentiana macrophylla</i> ;<br><i>Gentiana dahurica</i> ;<br><i>Gentiana straminea</i> | 147, 148 |
|                                                  | Gentianaline A (136)                                | <i>Gentiana crassicaulis</i> ;<br><i>Gentiana macrophylla</i> ;<br><i>Gentiana dahurica</i> ;<br><i>Gentiana straminea</i>                                                                  | 148      |
|                                                  | Gentianaline B (137)                                |                                                                                                                                                                                             |          |
|                                                  | Gentianaline C (138)                                |                                                                                                                                                                                             |          |
| <b>Steroids</b>                                  | Ecdysone 22-phosphate (S34)                         | <i>Schistocerca gregaria</i> ;<br><i>Bombyx mori</i>                                                                                                                                        | 149-151  |

|                                                                                                                                                 |                                                                                                                      |                  |
|-------------------------------------------------------------------------------------------------------------------------------------------------|----------------------------------------------------------------------------------------------------------------------|------------------|
| 2-Deoxyecdysone 22-phosphate ( <b>S35</b> )                                                                                                     | <i>Schistocerca gregaria</i> ;<br><i>Locusta migratoria</i> ;<br><i>Ascaris lumbricoides</i> ;<br><i>Bombyx mori</i> | 149-153          |
| 20-Hydroxyecdysone 22-phosphate ( <b>S36</b> )                                                                                                  | <i>Schistocerca gregaria</i> ;<br><i>Locusta migratoria</i> ;<br><i>Bombyx mori</i>                                  | 149, 151,<br>154 |
| 2-Deoxy-20-hydroxyecdysone 22-phosphate ( <b>S37</b> )                                                                                          | <i>Schistocerca gregaria</i> ;<br><i>Locusta migratoria</i> ;<br><i>Bombyx mori</i>                                  | 149, 151,<br>154 |
| 20-Hydroxyecdysone 3-acetate 22-phosphate ( <b>S38</b> )                                                                                        | <i>Locusta migratoria</i>                                                                                            | 154              |
| 3-Epi-2-deoxyecdysone 3-phosphate ( <b>S39</b> )                                                                                                | <i>Locusta migratoria</i>                                                                                            | 152, 155         |
| 22-Deoxy-20-hydroxyecdysone 3-phosphate ( <b>S40</b> )                                                                                          | <i>Bombyx mori</i>                                                                                                   | 156              |
| 3-Epi-22-deoxy-20-hydroxyecdysone 2-phosphate ( <b>S41</b> )                                                                                    | <i>Bombyx mori</i>                                                                                                   | 157              |
| 2,22-Dideoxy-20-hydroxyecdysone 3-phosphate ( <b>S42</b> )<br>Bombycosterol 3-phosphate ( <b>S43</b> )                                          | <i>Bombyx mori</i>                                                                                                   | 151, 158         |
| 3-Epi-22-deoxy-20,26-dihydroxyecdysone 2-phosphate ( <b>139</b> )<br>3-Epi-22-deoxy-16 $\beta$ ,20-dihydroxyecdysone 2-phosphate ( <b>140</b> ) | <i>Bombyx mori</i>                                                                                                   | 159              |
| 2,22-dideoxy-23-hydroxyecdysone 3-phosphate ( <b>141</b> )                                                                                      | <i>Bombyx mori</i>                                                                                                   | 160              |
| Haplosamate A ( <b>142</b> )                                                                                                                    | <i>Xestospongia</i> sp.;<br><i>Cribrachalina</i> sp.;<br><i>Dasychalina</i> sp.                                      | 161-163          |
| Haplosamate B ( <b>143</b> )                                                                                                                    | <i>Xestospongia</i> sp.;<br><i>Cribrachalina</i> sp.                                                                 | 161, 162         |
| Desulfohaplosamate ( <b>144</b> )                                                                                                               | <i>Dasychalina</i> sp.                                                                                               | 163              |
| <b>145</b> (unnamed compound)                                                                                                                   | <i>Cribrachalina</i> sp.                                                                                             | 162              |
| RPR113228 ( <b>S44</b> )                                                                                                                        | <i>Chrysosporium lobatum</i> ;<br><i>Chrysosporium</i> sp.                                                           | 164, 165         |
| Tremasterol A ( <b>S45</b> )<br>Tremasterol B ( <b>S46</b> )<br>Tremasterol C ( <b>S47</b> )<br>Tremasterol D ( <b>S48</b> )                    | <i>Tremaster novaecaledoniae</i>                                                                                     | 166, 167         |

**Table S2. Calyculin A (23): Biological Studies**

|                                                                                                                                                                                                                      | <b>Ref.</b> |
|----------------------------------------------------------------------------------------------------------------------------------------------------------------------------------------------------------------------|-------------|
| Inhibited NK cell function in mice                                                                                                                                                                                   | 168         |
| Inhibited cytoplasmic streaming and induced morphological changes in the cytoplasm of root hair cells of <i>L. stoloniferum</i>                                                                                      | 169         |
| Induced focal adhesion assembly and tyrosine phosphorylation of non-receptor tyrosine kinase p125 <sup>Fak</sup> , of adapter proteins p130 <sup>Cas</sup> , and paxillin in Swiss 3T3 cells                         | 170         |
| Myosin activity is necessary for calyculin A-induced cytoplasmic spheric bodies formation in root hair cells of <i>L. stoloniferum</i>                                                                               | 171         |
| Calyculin A (23) had multiple effects on chromosome movements during anaphase and altered the distribution of spindle proteins in crane-fly spermatocytes                                                            | 172         |
| Induced actin phosphorylation and depolymerization in renal epithelial cells                                                                                                                                         | 173         |
| Promoted activation of several endogenous platelet protein kinases                                                                                                                                                   | 174         |
| Promoted retraction of mature megakaryocytes proplatelets derived from murine embryonic stem cells                                                                                                                   | 175         |
| Modulated activation markers in TRAP-stimulated human platelets                                                                                                                                                      | 176         |
| Impaired clot retraction, platelet activation and thrombin generation in human platelets                                                                                                                             | 177         |
| Induced inhibition of the transition from mitosis to interphase in <i>C. japonicus</i> eggs                                                                                                                          | 178         |
| Promoted activation of the signalling pathways involving mitogen-activated protein kinase p38 <sup>MAPK</sup> and mitochondrial Ca <sup>2+</sup> -mediated oxidative stress                                          | 179         |
| Induced inhibition of PP2A, activation of glycogen synthase kinase-3 (GSK-3) in wild type neuroblastoma N2a cells, and tau hyperphosphorylation at both PHF-1 and tau-1 epitopes                                     | 180         |
| Hyperphosphorylation of tau protein and neurofilaments induced by calyculin A (23) in neuroblastoma N2a cells was reversed by the alkaloid berberine                                                                 | 181         |
| Stimulated the expression of TNF- $\alpha$ mRNA in mouse osteoblastic MC3T3-E1 cells                                                                                                                                 | 182         |
| Increased the expression of TNF- $\alpha$ mRNA and activation of NF- $\kappa$ B <i>via</i> phosphorylation and nuclear translocation of NF- $\kappa$ B in primary osteoblasts from new-born rat calvaria             | 183         |
| Combination of calyculin A (23) and celecoxib inhibited epithelial-mesenchymal transition in human oral squamous cell carcinoma (HSC-3 cells)                                                                        | 184         |
| Promoted phosphorylation of Ser473 in protein kinase B/AkT supporting levels of AkT activation like those found under physiological serum-growth conditions                                                          | 185         |
| Inhibited expression of CD8 $\alpha$ but not of CD4 in human peripheral blood T cells                                                                                                                                | 186         |
| Blocked ERK5 activation by the epidermal growth factors and oxidative stress                                                                                                                                         | 187         |
| Suppressed the decline in protein phosphorylation state and increased an inactive form of PP1 in the post-acrosomal region of boar spermatozoa                                                                       | 188         |
| Calyculin A-sensitive protein phosphatases (PP1/PP2A) suppressed full activation of protein kinase A, and enhanced the phosphorylation state of flagellar proteins in sperm flagella of mouse epididymal spermatozoa | 189         |
| Induced association of vimentin with 14-3-3 protein family in COS-7 cells                                                                                                                                            | 190         |
| Induced centrosome-directed translocation of Weibel-Palade bodies in human aortic endothelial cells                                                                                                                  | 191         |
| Induced elongation of microvilli in unfertilized sea urchin eggs                                                                                                                                                     | 192         |
| Induced cortical contraction in unfertilized sea urchin eggs                                                                                                                                                         | 193         |
| Promoted reorganization of the actin cytoskeleton and the cell centre in sea urchin coelomocytes                                                                                                                     | 194         |
| Promoted activation of histone H <sub>1</sub> kinase and condensation of chromosomes in unfertilized sea urchin eggs                                                                                                 | 195         |
| Melatonin protected SH-SY5Y neuroblastoma cells from calyculin A-induced neurofilament impairment and neurotoxicity                                                                                                  | 196         |
| Injection of calyculin A (23) into rat hippocampus bilaterally led to lesions in spatial memory retention                                                                                                            | 197         |

|                                                                                                                                                                                                                                  |     |
|----------------------------------------------------------------------------------------------------------------------------------------------------------------------------------------------------------------------------------|-----|
| Induced neurite retraction in cultured hippocampal neurons                                                                                                                                                                       | 198 |
| Intraperitoneal administration of melatonin before injection of calyculin A ( <b>23</b> ) prevented calyculin A-induced synaptophysin loss, memory retention deficits and hyperphosphorylation of tau protein and neurofilaments | 199 |
| Suppressed <i>in vivo</i> early elimination of histone $\gamma$ -H2AX and DNA double-strand breaks repair                                                                                                                        | 200 |
| Inhibited $\gamma$ -H2AX dephosphorylation involved in double-strand breaks                                                                                                                                                      | 201 |
| Calyculin A ( <b>23</b> ) was used as a useful tool to mark the induced $\gamma$ -H2AX foci after low dose irradiation of lymphocytes                                                                                            | 202 |
| Enhanced cyclic D1 phosphorylation and degradation, and arrested cell cycle progression in human breast cancer cells                                                                                                             | 203 |
| Calyculin A ( <b>23</b> ) acted as a dual action toxin that blocked calcium influx and inhibited protein Ser/Thr phosphatases                                                                                                    | 204 |
| Combination of calyculin A ( <b>23</b> ) and zoledronic acid showed synergistic cytotoxicity and apoptosis against MCF-7 and MDA-MB-231 breast cancer cells                                                                      | 205 |
| Inhibited potassium channel currents in vascular smooth muscle cells by a mechanism not mediated by the inhibition of protein phosphatases                                                                                       | 206 |
| Calyculin A ( <b>23</b> ) doubled the twitch magnitude and increased its duration by 50% in field-stimulated cells but did not significantly increase sarcoplasmic reticulum $Ca^{2+}$ uptake                                    | 207 |
| Disrupted sub-plasmalemmal junction and recurring $Ca^{2+}$ waves in vascular smooth muscle                                                                                                                                      | 208 |
| Calyculin A-sensitive phosphatases dephosphorylated the sodium-hydrogen exchanger 3 protein (NHE3) altering its activity in opossum kidney cells                                                                                 | 209 |
| Enhanced apoptosis mediated by tumour necrosis factor-related apoptosis-inducing ligand (TRAIL) in human renal carcinoma cell line (Caki)                                                                                        | 210 |
| Triggered cell shrinkage and phospholipid scrambling of the erythrocyte cell membrane                                                                                                                                            | 211 |
| Inhibited nitroergic relaxations of the mouse anococcygeus muscle                                                                                                                                                                | 212 |
| Decreased $Ca^{2+}$ concentration in rat basophilic leukemic cells during activation of the $Ca^{2+}$ release-activated $Ca^{2+}$ entry pathway                                                                                  | 213 |
| Induced endothelial cell shape changes in bovine pulmonary artery endothelial cells                                                                                                                                              | 214 |
| Calyculin A ( <b>23</b> ) revealed the role of protein serine/threonine phosphatases in controlling the transcriptional activity of STAT 3                                                                                       | 215 |
| Prevented DNA fragmentation, Bax translocation, caspase 8 cleavage, and Bid degradation in human myeloma leukemic cells (ML-1 cells)                                                                                             | 216 |
| Induced expression of PTEN, a tumour suppressor gene encoding a phosphatase, through activation of EGR-1 during apoptosis in human squamous carcinoma cells                                                                      | 217 |
| Induced apoptosis in human osteoblastic MG63 cells, elicited the phosphorylation of NF- $\kappa$ B on Ser-536 in human osteoblastic MG63 cells, promoting transcriptional activity of NF- $\kappa$ B related genes               | 218 |
| NADPH oxidase was not involved in the calyculin A-mediated inhibition of $Ca^{2+}$ influx into neutrophils                                                                                                                       | 219 |
| Treatment of pollen tubes of <i>L. longiflorum</i> with calyculin A ( <b>23</b> ) after germination arrested growth, reversibly altered the alignment of actin bundles, and disassembled microtubules                            | 220 |
| Induced subapical membrane aggregation and actin baskets supporting retrograde membrane flow in <i>L. longiflorum</i>                                                                                                            | 221 |
| A calyculin A-sensitive protein phosphatase is required for <i>B. anthracis</i> lethal toxin induced cytotoxicity                                                                                                                | 222 |
| The phosphorylation level of prohibitin, a chaperone involved in the assembly of mitochondrial respiratory chain complex, was increased after calyculin A ( <b>23</b> ) treatment in a rice lesion-mimic mutant in <i>cdr1</i>   | 223 |

**Table S3. Adenophostin A (90): Biological Studies**

|                                                                                                                                                                                                                                                         | <b>Ref.</b> |
|---------------------------------------------------------------------------------------------------------------------------------------------------------------------------------------------------------------------------------------------------------|-------------|
| Rescued inhibition of myristoylated alanine-rich C kinase substrate in permeabilized human sperm                                                                                                                                                        | 224         |
| Activated plasma membrane large-conductance Ca <sup>2+</sup> -activated K <sup>+</sup> channels in mice cerebral artery smooth muscle cells                                                                                                             | 225         |
| Application of AdA (90) into stratum pyramidale non-pyramidal neurons in rat hippocampal slices enhanced excitatory post-synaptic currents on non-pyramidal neurons in the stratum pyramidale and occluded paired stimuli-induced synaptic potentiation | 226         |
| Post-synaptic infusions of AdA (90) enhanced type A GABA receptor-gated inhibitory postsynaptic currents                                                                                                                                                | 227         |
| Increased peak sodium current amplitude in cultured rat striatal neurons                                                                                                                                                                                | 228         |
| Aged mouse eggs injected with AdA (90) induced Ca <sup>2+</sup> -oscillations, caused fragmentation, and other signs of programmed cell death                                                                                                           | 229         |
| Post-synaptic perfusion of AdA (90) increased the probability of detecting synaptic responses during subthreshold presynaptic stimulation and increased spontaneous excitatory postsynaptic current frequency                                           | 230         |
| Activation of postsynaptic inositol InsP <sub>3</sub> receptors with AdA (90) produced a large increase in AMPA receptor excitatory postsynaptic current amplitudes at hippocampal CA1 synapses                                                         | 231         |
| No oscillations were induced in the [Ca <sup>2+</sup> ] <sub>i</sub> at interphase in mouse zygotes                                                                                                                                                     | 232         |
| Induced temporal degradation of type I InsP <sub>3</sub> receptor in bovine oocytes                                                                                                                                                                     | 233         |
| Activated store-operated Ca <sup>2+</sup> current in rat basophilic leukaemia cells in weak buffer                                                                                                                                                      | 234         |
| Rescued calcium-induced exocytosis impaired by inhibiting PKC, PLD or sequestering PIP <sub>2</sub> , but did not trigger exocytosis                                                                                                                    | 235         |
| Eggs injected with AdA (90) showed enhanced Ca <sup>2+</sup> responses to CaCl <sub>2</sub> injections                                                                                                                                                  | 236         |
| Induced depletion of Ca <sup>2+</sup> stores in permeabilized microvillar photoreceptors of <i>H. medicinalis</i>                                                                                                                                       | 237         |
| Treatment of taste receptor cells of the flesh fly <i>B. peregrina</i> with AdA (90) and deoxycholate elicited the response of the sugar receptor cell                                                                                                  | 238         |
| Microinjections of AdA (90) and InsP <sub>3</sub> transiently inhibited growth and induced subapical branches in <i>N. crassa</i>                                                                                                                       | 239         |
| Failed to affect bupivacaine anaesthesia in the tail-flick test in mice                                                                                                                                                                                 | 240         |
| Injections of AdA (90) in nerve terminals of the opener muscle of the first walking leg of <i>P. clarkii</i> greatly enhanced synaptic transmission                                                                                                     | 241         |
| AdA (90) was able to mobilize Ca <sup>2+</sup> from aorta microsomes                                                                                                                                                                                    | 242         |
| Activation of InsP <sub>3</sub> receptors with AdA (90) in permeabilized cells induced Ca <sup>2+</sup> release in the nuclear domain and other regions of cardiac myocytes isolated from neonatal mouse                                                | 243         |
| Increased basal [Ca <sup>2+</sup> ] <sub>i</sub> and the frequency of spontaneous Ca <sup>2+</sup> sparks in saponin-permeabilized myocytes                                                                                                             | 244         |
| Caused an elevation of 1,4,5-inositol triphosphate-dependent nuclear Ca <sup>2+</sup> concentration                                                                                                                                                     | 245         |
| Caused depletion of loaded intracellular Ca <sup>2+</sup> stores in crypt and surface cells in saponin-permeabilized rat colonic crypts                                                                                                                 | 246         |
| Stimulation of InsP <sub>3</sub> receptors <i>via</i> intracellular dialysis of AdA (90) largely abolished the arachidonic acid-mediated Ca <sup>2+</sup> signal in rat pancreatic $\beta$ cells                                                        | 247         |
| Induced an outburst of ryanodine receptor-dependent spontaneous Ca <sup>2+</sup> sparks in permeabilized atrial myocytes of atrial fibrillation patients                                                                                                | 248         |
| An increase of cytosolic Ca <sup>2+</sup> concentration within cells was observed when AdA (90) encapsulated with 100-nm gold-coated liposomes was injected in the cytosol of single ovarian carcinoma cells                                            | 249         |
| Activation of InsP <sub>3</sub> receptor by AdA (90) was shown to be essential for the opening of mouse transient receptor potential type 5 (mTRP5) in <i>Xenopus</i> oocytes.                                                                          | 250         |

## References

1. J. B. Tunac, B. D. Graham and W. E. Dobson, *J. Antibiot.*, 1983, **36**, 1595-1600.
2. S. S. Stampwala, R. H. Bunge, T. R. Hurley, N. E. Willmer, A. J. Brankiewicz, C. E. Steinman, T. A. Smitka and J. C. French, *J. Antibiot.*, 1983, **36**, 1601-1605.
3. S. S. Stampwala, J. C. French, J. B. Tunac, T. R. Hurley and R. H. Bunge, *Eur. Pat. Appl.*, 87021 A2, 1983.
4. G. C. Hokanson and J. C. French, *J. Org. Chem.*, 1985, **50**, 462-466.
5. S. S. Stampwala, J. C. French, J. B. Tunac, T. R. Hurley and R. H. Bunge, *U.S. Pat.*, 447,544, 1986.
6. W. R. Leopold, J. L. Shillis, A. E. Mertus, J. M. Nelson, B. J. Roberts and R. C. Jackson, *Cancer Res.*, 1984, **44**, 1928-1932.
7. R. C. Jackson, D. W. Fry, T. J. Boritzki, B. J. Roberts, K. E. Hook and W. R. Leopold, *Adv. Enzyme Regul.*, 1985, **23**, 193-215.
8. C. P. Burke, N. Haq and D. L. Boger, *J. Am. Chem. Soc.*, 2010, **132**, 2157-2159.
9. H. Ohkuma, N. Naruse, Y. Nishiyama, T. Tsuno, Y. Hoshino, Y. Sawada, M. Konishi and T. Oki, *J. Antibiot.*, 1992, **45**, 1239-1249.
10. S. S. Thomasi, C. Ladeira, D. Ferreira, R. F. Sprenger, A. C. Badino, A. G. Ferreira and T. Venâncio, *Helv. Chim. Acta*, 2016, **99**, 281-285.
11. R. W. Burg, O. D. Hensens, J. M. Liesch, L. J. Cole and S. Hernandez, *UK Pat. Appl.*, 2219296 A, 1989.
12. M. Amemiya, T. Someno, R. Sawa, H. Naganawa, M. Ishizuka and T. Takeuchi, *J. Antibiot.*, 1994, **47**, 541-544.
13. M. Amemiya, M. Ueno, M. Osono, T. Masuda, N. Kinoshita, C. Nishida, M. Hamada, M. Ishizuka and O. Takeuchi, *J. Antibiot.*, 1994, **47**, 536-540.
14. M. Uramoto, Y.-C. Shen, N. Takizawa, H. Kusakabe and K. Isono, *J. Antibiot.*, 1985, **38**, 665-668.
15. S. Fushimi, K. Furihata and H. Seto, *J. Antibiot.*, 1989, **42**, 1026-1036.
16. S. Fushimi, S. Nishikawa, A. Shimazu and H. Seto, *J. Antibiot.*, 1989, **42**, 1019-1025.
17. T. Ozasa, K. Suzuki, M. Sasamata, K. Tanaka, M. Kobori, S. Kadota, K. Nagai, T. Saito, S. Watanabe and M. Iwanami, *J. Antibiot.*, 1989, **42**, 1331-1338.
18. T. Ozasa, K. Tanaka, M. Sasamata, H. Kaniwa, M. Shimizu, H. Matsumoto and M. Iwanami, *J. Antibiot.*, 1989, **42**, 1339-1343.
19. T. Tomiya, M. Uramoto and K. Isono, *J. Antibiot.*, 1990, **43**, 118-121.
20. N. Mizuhara, Y. Usuki, M. Ogita, K.-I. Fujita, M. Kuroda, M. Doe, H. Iio and T. Tanaka, *J. Antibiot.*, 2007, **60**, 762-765.
21. T. Kohama, R. Enokita, T. Okazaki, H. Miyaoka, A. Torikata, M. Inukai, I. Kaneko, T. Kagasaki, Y. Sakaida, A. Satoh and A. Shiraishi, *J. Antibiot.*, 1993, **46**, 1503-1511.
22. T. Kohama, T. Nakamura, T. Kinoshita, I. Kaneko and A. Shiraishi, *J. Antibiot.*, 1993, **46**, 1512-1519.
23. T. Shibata, S. Kurihara, K. Yoda and H. Haruyama, *Tetrahedron*, 1995, **51**, 11999-12012.
24. M. S. Ghatge, N. Palaniappan, M. m. M. Alhamadsheh, J. DiBari and K. A. Reynolds, *Appl. Environ. Microbiol.*, 2009, **75**, 3469-3476.
25. S. Fotso, P. Graupner, Q. Xiong, D. Hahn, C. Avila-Adame and G. Davis, *J. Nat. Prod.*, 2013, **76**, 1509-1513.
26. M. Maeda, T. Kodama, S. Asami, N. Amano, T. Kusumi and H. Hosono, *Eur. Pat.*, 0329361 B1, 1995.
27. H. Zhang, M. M. Conte and R. J. Capon, *Angew. Chem. Int. Ed.*, 2010, **49**, 9904-9906.
28. M. T. Jamison and T. F. Molinski, *J. Nat. Prod.*, 2016, **79**, 2243-2249.
29. A. M. Orbin, Ph.D. Dissertation, University of Pennsylvania, 2012.

30. S. B. Zimmerman, C. D. Schwartz, R. L. Monaghan, B. A. Pelak, B. Weissberger, E. C. Gilfillan, S. Mochales, S. Hernandez, S. A. Currie, E. Tejera and E. O. Stapley, *J. Antibiot.*, 1987, **40**, 1677-1681.
31. K. E. Wilson, J. E. Flor, R. E. Schwartz, H. Joshua, J. L. Smith, B. A. Pelak, J. M. Liesch and O. D. Hensens, *J. Antibiot.*, 1987, **40**, 1682-1691.
32. L. Wu, H. Wu, L. Chen, X. Yu, R. Borriss and X. Gao, *Sci. Rep.*, 2015, **5**, 12975.
33. S. M. Im, N. H. Yu, H. W. Joen, S. O. Kim, H. W. Park, A. R. Park and J.-C. Kim, *Pestic. Biochem. Physiol.*, 2020, **163**, 130-137.
34. X. H. Chen, R. Scholz, M. Borriss, H. Junge, G. Mögel, S. Kunz and R. Borriss, *J. Biotechnol.*, 2009, **140**, 38-44.
35. X.-H. Chen, J. Vater, J. Piel, P. Franke, R. Scholz, K. Schneider, A. Koumoutsis, G. Hitzeroth, N. Grammel, A. W. Strittmatter, G. Gottschalk, R. D. Süssmuth and R. Borriss, *J. Bacteriol.*, 2006, **188**, 4024-4036.
36. Y. Kato, N. Fusetani, S. Matsunaga, K. Hashimoto, S. Fujita and T. Furuya, *J. Am. Chem. Soc.*, 1986, **108**, 2780-2781.
37. E. J. Dumdei, J. W. Blunt, M. H. G. Munro and L. K. Pannell, *J. Org. Chem.*, 1997, **62**, 2636-2639.
38. Y. Kato, N. Fusetani, S. Matsunaga, K. Hashimoto and K. Koseki, *J. Org. Chem.*, 1988, **53**, 3930-3932.
39. A. Okada, K. Watanabe, K. Umeda and M. Miyakado, *Agric. Biol. Chem.*, 1991, **55**, 2765-2771.
40. S. Matsunaga, H. Fujiki, D. Sakata and N. Fusetani, *Tetrahedron*, 1991, **47**, 2999-3006.
41. S. Matsunaga, T. Wakimoto and N. Fusetani, *J. Org. Chem.*, 1997, **62**, 2640-2642.
42. Y. Egami, T. Wakimoto and I. Abe, *Bioorg. Med. Chem. Lett.*, 2014, **24**, 5150-5153.
43. A. Takai, M. Eto, K. Hirano, K. Takeya, T. Wakimoto and M. Watanabe, *J. Physiol. Sci.*, 2018, **68**, 1-17.
44. T. Wakimoto, S. Matsunaga, A. Takai and N. Fusetani, *Chem. Biol.*, 2002, **9**, 309-319.
45. X. Fu, F. J. Schmitz, M. Kelly-Borges, T. L. McCready and C. F. B. Holmes, *J. Org. Chem.*, 1998, **63**, 7957-7963.
46. S. Kehraus, G. M. König and A. D. Wright, *J. Nat. Prod.*, 2002, **65**, 1056-1058.
47. R. A. Edrada, R. Ebel, A. Supriyono, V. Wray, P. Schupp, K. Steube, R. van Soest and P. Proksch, *J. Nat. Prod.*, 2002, **65**, 1168-1172.
48. C. J. Wegerski, J. Hammond, K. Tenney, T. Matainaho and P. Crews, *J. Nat. Prod.*, 2007, **70**, 89-94.
49. C. Imperatore, P. Luciano, A. Aiello, R. Vitalone, C. Irace, R. Santamaria, J. Li, Y.-W. Guo and M. Menna, *J. Nat. Prod.*, 2016, **79**, 1144-1148.
50. P. Luciano, C. Imperatore, M. Senese, A. Aiello, M. Casertano, Y.-W. Guo and M. Menna, *J. Nat. Prod.*, 2017, **80**, 2118-2123.
51. N. Oku, K. Takada, R. W. Fuller, J. A. Wilson, M. L. Peach, L. K. Pannell, J. B. McMahan and K. R. Gustafson, *J. Am. Chem. Soc.*, 2010, **132**, 10278-10285.
52. T. Hosoe, K. Fukushima, K. Takizawa, T. Itabashi, N. Kawahara, V. Vidotto and K.-i. Kawai, *J. Antibiot.*, 2006, **59**, 597-600.
53. T. Tono, R. Kawahara, Y. Yoshinaga, T. Inohana, K. Fujimori and I. Shiina, *Tetrahedron Lett.*, 2015, **56**, 1356-1359.
54. I. Kozono, J.-Y. Ueda, M. Watanabe, S. Nogami, A. Nagai, S. Inaba, Y. Ohya, M. Takagi and K. Shin-Ya, *J. Antibiot.*, 2009, **62**, 159-162.
55. B. Perlatti, N. Lan, M. Xiang, C. E. Earp, J. E. Spraker, C. J. B. Harvey, C. B. Nichols, J. A. Alspaugh, J. B. Gloer and G. F. Bills, *J. Ind. Microbiol. Biotechnol.*, 2021, **48**, kuab022.
56. T. Stijve, J. Klán and T. W. Kuyper, *Persoonia*, 1985, **12**, 469-473.
57. C. Lenz, J. Wick and D. Hoffmeister, *J. Nat. Prod.*, 2017, **80**, 2835-2838.



58. K. Gotvaldová, K. Hájková, J. Borovička, R. Jurok, P. Cihlářová and M. Kuchař, *Drug Test. Anal.*, 2021, **13**, 439-446.
59. M. Halama, A. Poliwoda, I. Jasicka-Misiak, P. P. Wieczorek and R. Rutkowski, *Open Life Sci.*, 2015, **10**, 40–51.
60. J. Gartz, *Int. J. Crude Drug Res.*, 1989, **27**, 141-144.
61. S. Borner and R. Brenneisen, *J. Chromatogr. A*, 1987, **408**, 402-408.
62. J. Gartz, *J. Basic Microbiol.*, 1994, **34**, 17-22.
63. Y. Koike, K. Wada, G. Kusano, S. Nozoe and K. Yokoyama, *J. Nat. Prod.*, 1981, **44**, 362-365.
64. A. Y. Leung, A. H. Smith and A. G. Paul, *J. Pharm. Sci.*, 1965, **54**, 1576-1579.
65. J. Jokiranta, S. Mustola, E. Ohenoja and M. M. Airaksinen, *Planta Med.*, 1984, **50**, 277-278.
66. T. Stijve and T. W. Kuyper, *Planta Med.*, 1985, **51**, 385-387.
67. A. Hofmann, R. Heim, A. Brack, H. Kobel, A. Frey, H. Ott, T. Petrzilka and F. Troxler, *Helv. Chim. Acta*, 1959, **42**, 1557-1572.
68. J. Gartz, *Biochem. Physiol. Pflanz.*, 1986, **181**, 511-517.
69. J. Borovička, M. Oborník, J. Štříbrný, M. E. Noordeloos, L. A. P. Sánchez and M. Gryndler, *Persoonia*, 2015, **34**, 1-9.
70. A. Y. Leung and A. G. Paul, *J. Pharm. Sci.*, 1967, **56**, 146-146.
71. A. Y. Leung and A. G. Paul, *J. Pharm. Sci.*, 1968, **57**, 1667-1671.
72. D. B. Repke and D. T. Leslie, *J. Pharm. Sci.*, 1977, **66**, 113-114.
73. N. Jensen, J. Gartz and H. Laatsch, *Planta Med.*, 2006, **72**, 665-666.
74. M. Hashimoto, T. Taguchi, S. Nishida, K. Ueno, K. Koizumi, M. Aburada and K. Ichinose, *J. Antibiot.*, 2007, **60**, 752-756.
75. K. Sakamoto, E. Tsujii, F. Abe, T. Nakanishi, M. Yamashita, N. Shigematsu, S. Izumi and M. Okuhara, *J. Antibiot.*, 1996, **49**, 37-44.
76. R. E. Mitchell and R. D. Durbin, *Physiol. Plant Pathol.*, 1981, **18**, 157-168.
77. A. E. Aliev, K. Karu, R. E. Mitchell and M. J. Porter, *Org. Biomol. Chem.*, 2016, **14**, 238-245.
78. R. S. Kalidindi, W. Y. Yoshida, J. A. Palermo, P. J. Scheuer and M. Kelly-Borges, *Tetrahedron Lett.*, 1994, **35**, 5579-5582.
79. B. C. VanWagenen, R. Larsen, J. H. Cardellina, D. Randazzo, Z. C. Lidert and C. Swithenbank, *J. Org. Chem.*, 1993, **58**, 335-337.
80. R. J. R. Molica, E. J. A. Oliveira, P. V. V. C. Carvalho, A. N. S. F. Costa, M. C. C. Cunha, G. L. Melo and S. M. F. O. Azevedo, *Harmful Algae*, 2005, **4**, 743-753.
81. W. W. Carmichael and P. R. Gorham, *Mitt. Int. Ver. Theor. Angew. Limnol.*, 1978, **21**, 285-295.
82. M. F. Fiore, S. T. Lima, W. W. Carmichael, S. M. K. McKinnie, J. R. Chekan and B. S. Moore, *Harmful Algae*, 2020, **92**, 101737.
83. S. Matsunaga, R. E. Moore, W. P. Niemczura and W. W. Carmichael, *J. Am. Chem. Soc.*, 1989, **111**, 8021-8023.
84. H. Onodera, Y. Oshima, P. Henriksen and T. Yasumoto, *Toxicon*, 1997, **35**, 1645-1648.
85. N. A. Mahmood and W. W. Carmichael, *Toxicon*, 1987, **25**, 1221-1227.
86. N. A. Mahmood and W. W. Carmichael, *Toxicon*, 1986, **24**, 425-434.
87. V. Becker, P. Ihara, J. S. Yunes and V. L. M. Huszar, *J. Appl. Phycol.*, 2010, **22**, 235-241.
88. P. Henriksen, W. W. Carmichael, J. An and Ø. Moestrup, *Toxicon*, 1997, **35**, 901-913.
89. T. Okano, T. Sano and K. Kaya, *Tetrahedron Lett.*, 1999, **40**, 2379-2382.
90. F. Yokokawa, A. Inaizumi and T. Shioiri, *Tetrahedron*, 2005, **61**, 1459-1480.
91. T. Aoyagi, H. Morishima, K. Kojiri, T. Yamamoto, F. Kojima, K. Nagaoka, M. Hamada, T. Takeuchi and H. Umezawa, *J. Antibiot.*, 1989, **42**, 486-488.
92. K. Kojiri, H. Morishima, T. Yamamoto, T. Aoyagi, T. Takeuchi and H. Umezawa, *J. Antibiot.*, 1989, **42**, 489-490.

93. C. Kempter, D. Kaiser, S. Haag, G. Nicholson, V. Gnau, T. Walk, K. H. Gierling, H. Decker, H. Zähler, G. Jung and J. W. Metzger, *Angew. Chem. Int. Ed.*, 1997, **36**, 498-501.
94. Z. Hojati, C. Milne, B. Harvey, L. Gordon, M. Borg, F. Flett, B. Wilkinson, P. J. Sidebottom, B. A. M. Rudd, M. A. Hayes, C. P. Smith and J. Micklefield, *Chem. Biol.*, 2002, **9**, 1175-1187.
95. D. A. Hopwood and H. M. Wright, *J. Gen. Microbiol.*, 1983, **129**, 3575-3579.
96. A. Plaza, G. Bifulco, J. L. Keffer, J. R. Lloyd, H. L. Baker and C. A. Bewley, *J. Org. Chem.*, 2009, **74**, 504-512.
97. J. K. MacLeod, C. Braybrook, P. M. Simmonds and P. B. Oelrichs, *Aust. J. Chem.*, 2000, **53**, 293-297.
98. P. B. Oelrichs, J. K. MacLeod, A. A. Seawright and P. B. Grace, *Toxicon*, 2001, **39**, 1933-1936.
99. P. B. Oelrichs, J. K. MacLeod, A. A. Seawright, M. R. Moore, J. C. Ng, F. Dutra, F. Riet-Corfeá, M. C. Mendez and S. M. Thamsborg, *Toxicon*, 1999, **37**, 537-544.
100. J.-L. Boevé, R. Rozenberg, A. Shinohara and S. Schmidt, *PLoS One*, 2014, **9**, e105301.
101. U. Schacht and G. Huber, *J. Antibiot.*, 1969, **22**, 597-602.
102. K. H. Wallhausser, G. Neseemann, P. Prave and A. Steigler, *Antimicrob. Agents Chemother.*, 1965, **5**, 734-736.
103. B. Ostash and S. Walker, *Nat. Prod. Rep.*, 2010, **27**, 1594-1617.
104. B. Subramaniam-Niehaus, T. Schneider, J. W. Metzger and W. Wohlleben, *Z. Naturforsch., C: J. Biosci.*, 1997, **52**, 217-226.
105. M. Kurz, W. Guba and L. Vértesy, *Eur. J. Biochem.*, 1998, **252**, 500-507.
106. P. Welzel, F.-J. Witteler, D. Müller and W. Riemer, *Angew. Chem. Int. Ed.*, 1981, **20**, 121-123.
107. H.-W. Fehlhaber, M. Girg, G. Seibert, K. Hobert, P. Welzel, Y. van Heijenoort and J. van Heijenoort, *Tetrahedron*, 1990, **46**, 1557-1568.
108. G. Huber, U. Schacht, H. L. Weidenmüller, J. Schmidt-Thomé, J. Duphorn and R. Tschesche, *Antimicrob. Agents Chemother.*, 1965, **5**, 737-742.
109. M. Zehl, E. Pittenauer, A. Rizzi and G. Allmaier, *J. Am. Soc. Mass. Spectrom.*, 2006, **17**, 1081-1090.
110. F. Lindner, K. H. Wallhausser and G. Huber, *U.S. Pat.*, 3,674,866, 1972.
111. A. Donnerstag, S. Marzian, D. Müller, P. Welzel, D. Böttger, A. Stärk, H.-W. Fehlhaber, A. Markus, Y. v. Heijenoort and J. v. Heijenoort, *Tetrahedron*, 1995, **51**, 1931-1940.
112. M. Heßler-Klitz, K. Hobert, A. Biellaß, T. Siegels, M. Hiegemann, A. Maulshagen, D. Müller, P. Welzel, G. Huber, D. Böttger, A. Markus, G. Seibert, A. Stärk, H.-W. Fehlhaber, Y. v. Heijenoort and J. v. Heijenoort, *Tetrahedron*, 1993, **49**, 7667-7678.
113. J. Scherkenbeck, A. Hiltmann, K. Hobert, W. Bankova, T. Siegels, M. Kaiser, D. Müller, H. J. Veith, H.-W. Fehlhaber, G. Seiberg, A. Markus, M. Limbert, G. Huber, D. Böttger, A. Stärk, S. Takahashi, Y. van Heijenoort, J. van Heijenoort and P. Welzel, *Tetrahedron*, 1993, **49**, 3091-3100.
114. H. He, B. Shen, J. Korshalla, M. M. Siegel and G. T. Carter, *J. Antibiot.*, 2000, **53**, 191-195.
115. R. Uchida, M. Iwatsuki, Y.-P. Kim, S. Ōmura and H. Tomoda, *J. Antibiot.*, 2010, **63**, 157-163.
116. R. Uchida, M. Iwatsuki, Y.-P. Kim, S. Ohte, S. Ōmura and H. Tomoda, *J. Antibiot.*, 2010, **63**, 151-155.
117. M. Arai, A. Torikata, R. Enokita, H. Fukatsu, R. Nakayama and K. Yoshida, *J. Antibiot.*, 1977, **30**, 1049-1054.
118. M. Arai, R. Nakayama, K. Yoshida, M. Takeuchi, S. Teramoto and A. Torikata, *J. Antibiot.*, 1977, **30**, 1055-1059.

119. A. Torikata, H. Yoshikawa, T. Katayama, M. Arai, M. Nakahara and N. Kitano, *J. Antibiot.*, 1977, **30**, 1060-1063.
120. S. Takahashi, K. Serita, M. Arai, H. Seto, K. Furihata and N. Otake, *Tetrahedron Lett.*, 1983, **24**, 499-502.
121. M. Arai, A. Torikata, H. Fukatsu, N. Kitano and T. Matsuzawa, *U.S. Pat.*, 3,912,811, 1975.
122. N. Koyama, Y. Tokura, Y. Takahashi and H. Tomoda, *Bioorg. Med. Chem. Lett.*, 2013, **23**, 860-863.
123. Y. Fujita, R. Murakami, Y. Muramatsu, S. Miyakoshi and T. Takatsu, *J. Antibiot.*, 2008, **61**, 545-549.
124. R. Murakami, Y. Fujita, M. Kizuka, T. Kagawa, Y. Muramatsu, S. Miyakoshi, T. Takatsu and M. Inukai, *J. Antibiot.*, 2008, **61**, 537-544.
125. M. Takahashi, T. Kagasaki, T. Hosoya and S. Takahashi, *J. Antibiot.*, 1993, **46**, 1643-1647.
126. S. Takahashi, T. Kinoshita and M. Takahashi, *J. Antibiot.*, 1994, **47**, 95-100.
127. M. Takahashi, K. Tanzawa, K. Ogawa and T. Hosoya, *Eur. Pat. Appl.*, 0527646 A1, 1992.
128. J. G. Ellis and P. J. Murphy, *Mol. Gen. Genet.*, 1981, **181**, 36-43.
129. M. H. Ryder, M. E. Tate and G. P. Jones, *J. Biol. Chem.*, 1984, **259**, 9704-9710.
130. E. Messens, A. Lenaerts, R. W. Hedges and M. Van Montagu, *EMBO J.*, 1985, **4**, 571-577.
131. M. Lindberg, T. Norberg and S. Oscarson, *J. Carbohydr. Chem.*, 1992, **11**, 243-253.
132. H. Katoh, M. Yamada, K. Iida, M. Aoki, Y. Itezono, N. Nakayama, Y. Suzuki, M. Watanabe, H. Shimada, H. Fujimori, N. Nagata, S. Ohshima, J. Watanabe and T. Kamiyama, *Symp. Chem. Nat. Prod., Symp. Pap.*, 1996, **38**, 115-120.
133. S. L. F. Wiest, H. L. Pilz Júnior and L. M. Fiuza, *Bt Res.*, 2015, **6**, 1-12.
134. X. Liu, L. Ruan, D. Peng, L. Li, M. Sun and Z. Yu, *Toxins*, 2014, **6**, 2229-2238.
135. K. Šebesta, K. Horská and J. Vaňková, *Collect. Czech. Chem. Commun.*, 1969, **34**, 891-900.
136. Y. T. Kim and H. T. Huang, *J. Invertebr. Pathol.*, 1970, **15**, 100-108.
137. J. Farkaš, K. Šebesta, K. Horská, Z. Samek, L. Dolejš and F. Šorm, *Collect. Czech. Chem. Commun.*, 1969, **34**, 1118-1120.
138. E. McConnell and A. G. Richards, *Can. J. Microbiol.*, 1959, **5**, 161-168.
139. R. Neumann and H. H. Peter, *Experientia*, 1987, **43**, 1235-1237.
140. T. Kurokawa, K. Suzuki, T. Hayaoka, T. Nakagawa, T. Izawa, M. Kobayashi and N. Harada, *J. Antibiot.*, 1993, **46**, 1315-1318.
141. J. Wink, F.-R. Schmidt, G. Seibert and W. Aretz, *J. Antibiot.*, 2002, **55**, 472-479.
142. L. Vértesy, B. Beck, M. Brönstrup, K. Ehrlich, M. Kurz, G. Müller, D. Schummer and G. Seibert, *J. Antibiot.*, 2002, **55**, 480-494.
143. L. Vertesy, K. Ehrlich, M. Kurz and J. Wink, *U.S. Pat.*, US 6,756,402 B2, 2004.
144. C. J. Schulze, G. Navarro, D. Ebert, J. DeRisi and R. G. Linington, *J. Org. Chem.*, 2015, **80**, 1312-1320.
145. Y. Nakamura, H. Kato, T. Nishikawa, N. Iwasaki, Y. Suwa, H. Rotinsulu, F. Losung, W. Maarisit, R. E. P. Mangindaan, H. Morioka, H. Yokosawa and S. Tsukamoto, *Org. Lett.*, 2013, **15**, 322-325.
146. D. Spiteller, N. J. Oldham and W. Boland, *J. Org. Chem.*, 2004, **69**, 1104-1109.
147. D. E. Bierer, R. E. Gerber, S. D. Jolad, R. P. Ubillas, J. Randle, E. Nauka, J. Latour, J. M. Dener, D. M. Fort, J. E. Kuo, W. D. Inman, L. G. Dubenko, F. Ayala, A. Ozioko, C. Obialor, E. Elisabetsky, T. Carlson, T. V. Truong and R. C. Bruening, *J. Org. Chem.*, 1995, **60**, 7022-7026.
148. S. Ren, K. Deng, S. Qiu, M. Wang, B. Avula, S. K. Tripathi, M. R. Jacob, L. Gong, W. Wang, I. A. Khan and X.-C. Li, *J. Nat. Prod.*, 2020, **83**, 3207-3211.
149. R. E. Isaac, M. E. Rose, H. H. Rees and T. W. Goodwin, *Biochem. J.*, 1983, **213**, 533-541.

150. R. E. Isaac, M. E. Rose, H. H. Rees and T. W. Goodwin, *J. Chem. Soc., Chem. Commun.*, 1982, 249-251.
151. E. Ohnishi, M. Hiramoto, Y. Fujimoto, K. Kakinuma and N. Ikekawa, *Insect Biochem.*, 1989, **19**, 95-101.
152. G. Tsoupras, C. Hetru, B. Luu, E. Constantin, M. Lagueux and J. Hoffmann, *Tetrahedron*, 1983, **39**, 1789-1796.
153. C. F. O. R. Melo, C. Z. Esteves, R. N. Oliveira, T. M. Guerreiro, D. N. Oliveira, E. O. Lima, J. C. Miné, S. M. Allegretti and R. R. Catharino, *Parasitol. Res.*, 2016, **115**, 4107-4114.
154. G. Tsoupras, B. Luu and J. A. Hoffmann, *Steroids*, 1982, **40**, 551-560.
155. G. Tsoupras, C. Hetru, B. Luu, M. Lagueux, E. Constantin and J. A. Hoffmann, *Tetrahedron Lett.*, 1982, **23**, 2045-2048.
156. M. Kamba, Y. Mamiya, H. Sonobe and Y. Fujimoto, *Insect Biochem. Molec. Biol.*, 1994, **24**, 395-402.
157. Y. Mamiya, H. Sonobe, K. Yoshida, N. Hara and Y. Fujimoto, *Experientia*, 1995, **51**, 363-367.
158. M. Hiramoto, Y. Fujimoto, K. Kakinuma, N. Ikekawa and E. Ohnishi, *Experientia*, 1988, **44**, 623-625.
159. M. Kamba, H. Sonobe, Y. Mamiya, N. Hara and Y. Fujimoto, *Nat. Prod. Lett.*, 2000, **14**, 469-476.
160. M. Kamba, H. Sonobe, Y. Mamiya, N. Hara and Y. Fujimoto, *Nat. Prod. Lett.*, 2000, **14**, 349-356.
161. A. Qureshi and D. J. Faulkner, *Tetrahedron*, 1999, **55**, 8323-8330.
162. M. Fujita, Y. Nakao, S. Matsunaga, M. Seiki, Y. Itoh, R. W. M. van Soest, M. Heubes, D. J. Faulkner and N. Fusetani, *Tetrahedron*, 2001, **57**, 3885-3890.
163. G. Chianese, E. Fattorusso, O. Tagliatalata-Scafati, G. Bavestrello, B. Calcinaï, H. A. Dien, A. Ligresti and V. Di Marzo, *Steroids*, 2011, **76**, 998-1002.
164. D. Van der Pyl, P. Cans, J. J. Debernard, F. Herman, Y. Lelievre, L. Tahraoui, M. Vuilhorgne and J. Leboul, *J. Antibiot.*, 1995, **48**, 736-737.
165. A. Basilio, F. Pelaez, M. T. Diez, F. Vicente, S. A. Morris, J. E. Curotto, G. F. Bills, S. J. Dreikorn, O. D. Hensens, J. M. Liesch, R. G. Jenkins and J. R. Thompson, *U.S. Pat.*, 5,770,587, 1998.
166. F. De Riccardis, M. Iorizzi, L. Minale, R. Riccio and C. Debitus, *Tetrahedron Lett.*, 1992, **33**, 1097-1100.
167. F. De Riccardis, L. Minale, R. Riccio, B. Giovannitti, M. Iorizzi and C. Debitus, *Gazz. Chim. Ital.*, 1993, **123**, 79-86.
168. M. Kawada, M. Kawatsu, T. Masuda, S.-i. Ohba, M. Amemiya, T. Kohama, M. Ishizuka and T. Takeuchi, *Int. Immunopharmacol.*, 2003, **3**, 179-188.
169. E. Yokota, N. Imamichi, M. Tominaga and T. Shimmen, *Protoplasma*, 2000, **213**, 184-193.
170. D. Leopoldt, H. F. Yee Jr. and E. Rozengurt, *J. Cell. Physiol.*, 2001, **188**, 106-119.
171. E. Yokota, T. Izeki and T. Shimmen, *Protoplasma*, 2003, **221**, 217-226.
172. L. Fabian, J. Troscianczuk and A. Forer, *Cell Chromosome*, 2007, **6**, 1.
173. L. Gu, H. Zhang, Q. Chen and J. Chen, *Cell Motil.*, 2003, **54**, 286-295.
174. K. M. Lerea, A. Y. Venjara, S. C. Olson and M. R. Kelly, *Biochim. Biophys. Acta, Mol. Cell Res.*, 2007, **1773**, 185-191.
175. S. Tamaru, K. Kitajima, T. Nakano, K. Eto, A. Yazaki, T. Kobayashi, T. Matsumoto, H. Wada, N. Katayama and M. Nishikawa, *Biochem. Biophys. Res. Commun.*, 2008, **366**, 763-768.
176. Z. Simon, A. Kiss, F. Erdödi, H. Setiadi, I. Beke Debreceni, B. Nagy and J. Kappelmayer, *Platelets*, 2010, **21**, 555-562.
177. R. Hudák, J. Vincze, L. Csernoch, I. Beke Debreceni, T. Oláh, F. Erdödi, K. J. Clemetson and J. Kappelmayer, *BioMed Res. Int.*, 2017, 9795271.
178. Y. Hamaguchi and R. Kuriyama, *Cell Struct. Funct.*, 2002, **27**, 127-137.

179. K.-D. Chen, M.-T. Lai, J.-H. Cho, L.-Y. Chen and Y.-K. Lai, *J. Cell. Biochem.*, 2000, **76**, 585-595.
180. X.-C. Li, Z.-F. Wang, J.-X. Zhang, Q. Wang and J.-Z. Wang, *Eur. J. Pharmacol.*, 2005, **510**, 25-30.
181. X. Liu, J. Zhou, M. D. N. Abid, H. Yan, H. Huang, L. Wan, Z. Feng and J. Chen, *PLoS One*, 2014, **9**, e93974.
182. L. Qiu, K. Yoshida, B. R. Amorim, H. Okamura and T. Haneji, *Mol. Cell. Endocrinol.*, 2007, **271**, 38-44.
183. L. Qiu, L. Zhang, L. Zhu, D. Yang, Z. Li, K. Qin and X. Mi, *Oral Dis.*, 2008, **14**, 727-733.
184. B. K. Velmurugan, C.-H. Hua, M.-H. Tsai, C.-P. Lee, C.-M. Chung and Y.-C. Ko, *Biotech. Histochem.*, 2020, **95**, 341-348.
185. M. Pozuelo-Rubio, N. R. Leslie, J. Murphy and C. MacKintosh, *Cell Biochem. Biophys.*, 2010, **58**, 147-156.
186. A. Allam and H. Illges, *Immunobiology*, 2000, **202**, 353-362.
187. L. Garcia, F. Garcia, F. Llorens, M. Unzeta, E. Itarte and N. Gómez, *FEBS Lett.*, 2002, **523**, 90-94.
188. J. Adachi, S. Tate, M. Miyake and H. Harayama, *J. Reprod. Dev.*, 2008, **54**, 171-176.
189. N. Goto and H. Harayama, *J. Reprod. Dev.*, 2009, **55**, 327-334.
190. G. Tzivion, Z.-J. Luo and J. Avruch, *J. Biol. Chem.*, 2000, **275**, 29772-29778.
191. T. M. Vinogradova, V. E. Roudnik, V. B. Bystrevskaya and V. N. Smirnov, *Cell Motil.*, 2000, **47**, 141-153.
192. H. Tosuji, K. Miyaji, N. Fusetani and T. Nakazawa, *Cell Motil.*, 2000, **46**, 129-136.
193. Y. Asano and I. Mabuchi, *Cell Motil.*, 2001, **48**, 245-261.
194. J. H. Henson, S. E. Kolnik, C. A. Fried, R. Nazarian, J. McGreevy, K. L. Schulberg, M. Detweiler and V. A. Trabosh, *Cell Motil.*, 2003, **56**, 252-266.
195. H. Tosuji, N. Fusetani and Y. Seki, *Comp. Biochem. Physiol., Part C: Toxicol. Pharmacol.*, 2003, **135**, 415-424.
196. S. P. Li, Y. Q. Deng, X. C. Wang, Y. P. Wang and J.-Z. Wang, *J. Pineal Res.*, 2004, **36**, 186-191.
197. L. Sun, S. Y. Liu, X. W. Zhou, X. C. Wang, R. Liu, Q. Wang and J. Z. Wang, *Neuroscience*, 2003, **118**, 1175-1182.
198. A. Inutsuka, M. Goda and Y. Fujiyoshi, *Biochem. Biophys. Res. Commun.*, 2009, **390**, 1160-1166.
199. X. Yang, Y. Yang, Z. Fu, Y. Li, J. Feng, J. Luo, Q. Zhang, Q. Wang and Q. Tian, *J. Psychopharmacol.*, 2011, **25**, 1118-1125.
200. I. B. Nazarov, A. N. Smirnova, R. I. Krutilina, M. P. Svetlova, L. V. Solovjeva, A. A. Nikiforov, S.-L. Oei, I. A. Zalenskaya, P. M. Yau, E. M. Bradbury and N. V. Tomilin, *Radiat. Res.*, 2003, **160**, 309-317.
201. F. Antonelli, M. Belli, G. Cuttone, V. Dini, G. Esposito, G. Simone, E. Sorrentino and M. A. Tabocchini, *Radiat. Res.*, 2005, **164**, 514-517.
202. M. A. Kuefner, M. Brand, C. Engert, H. Kappey, M. Uder and L. V. Distel, *Int. J. Radiat Biol.*, 2013, **89**, 424-432.
203. J. R. Edelson and D. L. Brautigan, *Toxins*, 2011, **3**, 105-119.
204. M. Holy and D. L. Brautigan, *Toxins*, 2012, **4**, 940-954.
205. Z. Surmeli, P. Gursoy, A. P. Erdogan, E. Bozkurt, H. Atmaca, S. Uzunoglu, C. Sezgin, U. A. Şanlı, R. Uslu and B. Karaca, *Tumor Biol.*, 2016, **37**, 3665-3673.
206. S. T. Hanna and R. Wang, *J. Cardiovasc. Pharmacol.*, 2002, **40**, 660-668.
207. W. H. duBell, M. S. Gigena, S. Guatimosim, X. Long, W. J. Lederer and T. B. Rogers, *Am. J. Physiol. Heart Circ. Physiol.*, 2002, **282**, H38-H48.
208. C.-H. Lee, K.-H. Kuo, J. Dai, J. M. Leo, C. Y. Seow and C. v. Breemen, *Cell Calcium*, 2005, **37**, 9-16.
209. D. W. Dynia, A. G. Steinmetz and H. S. Kocinsky, *Am. J. Physiol. Renal Physiol.*, 2010, **298**, F745-F753.

210. S. M. Woo, K.-j. Min and T. K. Kwon, *Apoptosis*, 2012, **17**, 1223-1234.
211. M. Almasry, M. Jemaà, M. Mischitelli, C. Faggio and F. Lang, *Cell. Physiol. Biochem.*, 2016, **40**, 163-171.
212. A. Gibson, P. Wallace and I. McFadzean, *Eur. J. Pharmacol.*, 2003, **471**, 213-215.
213. N. E. Evans, M. K. L. Forth, A. K. Simpson and M. J. Mason, *Biochim. Biophys. Acta, Biomembr.*, 2005, **1718**, 32-43.
214. Y. M. Leung, T. K. Kwan, C. Y. Kwan and E. E. Daniel, *Biochim. Biophys. Acta, Mol. Cell Res.*, 2002, **1589**, 93-103.
215. C. Zgheib, F. A. Zouein, R. Chidiac, M. Kurdi and G. W. Booz, *J. Interferon Cytokine Res.*, 2012, **32**, 87-94.
216. N. Ganju and A. Eastman, *Biochem. Biophys. Res. Commun.*, 2002, **291**, 1258-1264.
217. H. Okamura, K. Yoshida, H. Morimoto and T. Haneji, *J. Cell. Biochem.*, 2005, **94**, 117-125.
218. H. Tanaka, K. Yoshida, H. Okamura, H. Morimoto, T. Nagata and T. Haneji, *Int. J. Oncol.*, 2007, **31**, 389-396.
219. J. Oommen, H. C. Steel, A. J. Theron and R. Anderson, *Biochem. Pharmacol.*, 2004, **68**, 1721-1728.
220. I. Foissner, F. Grolig and G. Obermeyer, *Protoplasma*, 2002, **220**, 1-15.
221. K. Hörmanseder, G. Obermeyer and I. Foissner, *Protoplasma*, 2005, **227**, 25-36.
222. J.-H. Kau, C.-G. Lin, H.-H. Huang, H.-L. Hsu, K.-C. Chen, Y.-P. Wu and H.-C. Lin, *Curr. Microbiol.*, 2002, **44**, 106-111.
223. A. Takahashi, T. Kawasaki, H. L. Wong, U. Suharsono, H. Hirano and K. Shimamoto, *Plant Physiol.*, 2003, **132**, 1861-1869.
224. M. J. Rodriguez Peña, J. V. Castillo Bennett, O. M. Soler, L. S. Mayorga and M. A. Michaut, *PLoS One*, 2013, **8**, e64551.
225. G. Zhao, Z. P. Neeb, M. D. Leo, J. Pachau, A. Adebisi, K. Ouyang, J. Chen and J. H. Jaggar, *J. Gen. Physiol.*, 2010, **136**, 283-291.
226. J.-H. Wang and P. Kelly, *J. Physiol.*, 2001, **533**, 407-422.
227. J. Wei, M. Zhang, Y. Zhu and J. H. Wang, *Neuroscience*, 2004, **127**, 637-647.
228. R. Hourez, K. Azdad, G. Vanwallegem, C. Roussel, D. Gall and S. N. Schiffmann, *Brain Res.*, 2005, **1059**, 189-196.
229. A. C. Gordo, P. Rodrigues, M. Kurokawa, T. Jellerette, G. E. Exley, C. Warner and R. Fissore, *Biol. Reprod.*, 2002, **66**, 1828-1837.
230. P. T. Kelly, R. L. MacKinnon, R. V. Dietz, B. J. Maher and J. Wang, *Mol. Brain Res.*, 2005, **135**, 232-248.
231. B. J. Maher, I. Roger L. MacKinnon, J. Bai, E. R. Chapman and P. T. Kelly, *J. Neurophysiol.*, 2005, **93**, 178-188.
232. T. Jellerette, M. Kurokawa, B. Lee, C. Malcuit, S.-Y. Yoon, J. Smyth, E. Vermassen, H. De Smedt, J. B. Parys and R. A. Fissore, *Dev. Biol.*, 2004, **274**, 94-109.
233. C. Malcuit, J. G. Knott, C. He, T. Wainwright, J. B. Parys, J. M. Robl and R. A. Fissore, *Biol. Reprod.*, 2005, **73**, 2-13.
234. A. B. Parekh, A. M. Riley and B. V. L. Potter, *Biochem. J.*, 2001, **361**, 133-141.
235. C. I. Lopez, L. E. Pelletán, L. Suhaiman, G. A. De Blas, N. Vitale, L. S. Mayorga and S. A. Belmonte, *Biochim. Biophys. Acta, Mol. Cell Biol. Lipids*, 2012, **1821**, 1186-1199.
236. H. Wu, J. Smyth, V. Luzzi, K. Fukami, T. Takenawa, S. L. Black, N. L. Allbritton and R. A. Fissore, *Biol. Reprod.*, 2001, **64**, 1338-1349.
237. K. Ukhanov, S. J. Mills, B. V. L. Potter and B. Walz, *Cell Calcium*, 2001, **29**, 335-345.
238. M. Koganezawa and I. Shimada, *J. Neurobiol.*, 2002, **51**, 66-83.
239. L. B. Silverman-Gavrila and R. R. Lew, *Eur. J. Cell Biol.*, 2001, **80**, 379-390.
240. F. L. Smith, S. J. LeBlanc and R. Carter, *Eur. J. Pain*, 2004, **8**, 153-161.

241. A. J. Dropic, E. Brailoiu and R. L. Cooper, *Comp. Biochem. Physiol., Part A: Mol. Integr. Physiol.*, 2005, **142**, 355-361.
242. S. C. Tovey, J. L. Dyer, R. E. Godfrey, S. Z. Khan, J. G. Bilmen, M. Mezna and F. Michelangeli, *Pharmacol. Res.*, 2000, **42**, 581-590.
243. K. D. García, T. Shah and J. García, *Am. J. Physiol. Cell Physiol.*, 2004, **287**, C1048-C1057.
244. A. V. Zima and L. A. Blatter, *J. Physiol.*, 2004, **555**, 607-615.
245. A. V. Zima, D. J. Bare, G. A. Mignery and L. A. Blatter, *J. Physiol.*, 2007, **584**, 601-611.
246. A. Siefjediers, M. Hardt, G. Prinz and M. Diener, *Cell Calcium*, 2007, **41**, 303-315.
247. V. Yeung-Yam-Wah, A. K. Lee and A. Tse, *Cell Calcium*, 2012, **51**, 140-148.
248. X. Liang, H. Xie, P. H. Zhu, J. Hu, Q. Zhao, C. S. Wang and C. Yang, *Cardiology*, 2009, **114**, 180-191.
249. G. V. Orsinger, J. D. Williams and M. Romanowski, *ACS Nano*, 2014, **8**, 6151-6162.
250. H. Kanki, M. Kinoshita, A. Akaike, M. Satoh, Y. Mori and S. Kaneko, *Mol. Pharmacol.*, 2001, **60**, 989-998.
